# Supplementary material for: A unique cell division protein critical for the assembly of the bacterial divisome
Source: eLife. 2024 Oct 3;12:RP87922. doi: 10.7554/eLife.87922 (PMC11449484; doi:10.7554/eLife.87922)
Supplement: Supplementary file 2. [file elife-87922-supp2.xls]

## Sheet: Genome
Supplementary Files 2 Substitution mutations and insertion-deletion (InDel) mutations of M1 and M2 compared with A. baumannii strain ATCC 17978 genome sequence
Type	Chr	Start	END	Ref	Obs	Gene accession no.	M1	M2
SNV	CP000521.1	101398	101398	A	G	A1S_0081(dist=614)	hom	-
SNV	CP000521.1	101410	101410	T	C	A1S_0081(dist=626)	hom	-
SNV	CP000521.1	101515	101515	T	C	A1S_0081(dist=731)	hom	hom
SNV	CP000521.1	101587	101587	C	T	A1S_0081(dist=803)	hom	hom
SNV	CP000521.1	101642	101642	G	A	A1S_0081(dist=858)	hom	hom
SNV	CP000521.1	101665	101665	C	T	A1S_0081(dist=881)	hom	hom
SNV	CP000521.1	101677	101677	A	C	A1S_0081(dist=893)	-	hom
SNV	CP000521.1	101678	101678	C	T	A1S_0081(dist=894)	-	hom
SNV	CP000521.1	101680	101680	G	A	A1S_0081(dist=896)	-	hom
SNV	CP000521.1	102413	102413	A	G	A1S_0081(dist=1629),A1S_0086(dist=1406)	hom	hom
SNV	CP000521.1	102444	102444	C	A	A1S_0081(dist=1660),A1S_0086(dist=1375)	hom	hom
SNV	CP000521.1	102445	102445	G	C	A1S_0081(dist=1661),A1S_0086(dist=1374)	hom	hom
SNV	CP000521.1	154871	154871	G	A	A1S_0129	-	het
SNV	CP000521.1	156961	156961	G	A	A1S_0131(dist=38);A1S_0130(dist=28)	hom	hom
SNV	CP000521.1	165413	165413	C	T	A1S_0140	-	het
SNV	CP000521.1	202345	202345	G	A	A1S_0180	-	het
SNV	CP000521.1	225739	225739	C	T	A1S_0202	-	het
SNV	CP000521.1	230437	230437	T	C	A1S_0207(dist=79);A1S_0205,A1S_0208(dist=79)	het	het
SNV	CP000521.1	230448	230448	C	T	A1S_0207(dist=68);A1S_0205,A1S_0208(dist=68)	het	het
SNV	CP000521.1	230450	230450	T	C	A1S_0207(dist=66);A1S_0205,A1S_0208(dist=66)	het	het
SNV	CP000521.1	230466	230466	A	G	A1S_0207(dist=50);A1S_0205,A1S_0208(dist=50)	het	het
SNV	CP000521.1	230470	230470	G	A	A1S_0207(dist=46);A1S_0205,A1S_0208(dist=46)	het	het
SNV	CP000521.1	230487	230487	G	A	A1S_0207(dist=29);A1S_0205,A1S_0208(dist=29)	het	het
SNV	CP000521.1	230509	230509	C	A	A1S_0207(dist=7);A1S_0205,A1S_0208(dist=7)	het	het
SNV	CP000521.1	230581	230581	G	A	A1S_0207	het	het
SNV	CP000521.1	230593	230593	C	T	A1S_0207	het	het
SNV	CP000521.1	230605	230605	G	A	A1S_0207	het	het
SNV	CP000521.1	230614	230614	T	A	A1S_0207	het	het
SNV	CP000521.1	230728	230728	C	T	A1S_0207	het	het
SNV	CP000521.1	230736	230736	C	A	A1S_0207	het	het
SNV	CP000521.1	230743	230743	T	C	A1S_0207	het	het
SNV	CP000521.1	230755	230755	A	G	A1S_0207	het	het
SNV	CP000521.1	230797	230797	T	C	A1S_0207	het	het
SNV	CP000521.1	230806	230806	A	T	A1S_0207	het	het
SNV	CP000521.1	230812	230812	C	T	A1S_0207	het	het
SNV	CP000521.1	230815	230815	C	T	A1S_0207	het	het
SNV	CP000521.1	230827	230827	T	C	A1S_0207	het	het
SNV	CP000521.1	230841	230841	T	C	A1S_0207	het	het
SNV	CP000521.1	230872	230872	C	T	A1S_0207	het	het
SNV	CP000521.1	230881	230881	C	T	A1S_0207	het	het
SNV	CP000521.1	232099	232099	G	A	A1S_0208,A1S_0209(dist=291)	het	het
SNV	CP000521.1	232103	232103	G	A	A1S_0208,A1S_0209(dist=287)	het	het
SNV	CP000521.1	232120	232120	C	T	A1S_0208,A1S_0209(dist=270)	het	het
SNV	CP000521.1	232176	232176	C	T	A1S_0208,A1S_0209,A1S_0210(dist=214)	het	het
SNV	CP000521.1	232180	232180	A	C	A1S_0208,A1S_0209,A1S_0210(dist=210)	het	het
SNV	CP000521.1	232845	232845	C	T	A1S_0209	het	het
SNV	CP000521.1	232887	232887	T	A	A1S_0209	het	het
SNV	CP000521.1	232908	232908	G	A	A1S_0209	het	het
SNV	CP000521.1	232948	232948	A	G	A1S_0209	het	het
SNV	CP000521.1	233013	233013	T	G	A1S_0209	het	het
SNV	CP000521.1	233022	233022	T	C	A1S_0209	het	het
SNV	CP000521.1	233099	233099	T	C	A1S_0209	het	het
SNV	CP000521.1	233123	233123	T	C	A1S_0209	het	het
SNV	CP000521.1	233159	233159	C	T	A1S_0210	het	het
SNV	CP000521.1	233162	233162	A	T	A1S_0210	het	het
SNV	CP000521.1	233165	233165	G	A	A1S_0210	het	het
SNV	CP000521.1	233186	233186	G	A	A1S_0210	het	het
SNV	CP000521.1	233216	233216	C	A	A1S_0210	het	het
SNV	CP000521.1	233258	233258	C	A	A1S_0210	het	het
SNV	CP000521.1	233259	233259	G	A	A1S_0210	het	het
SNV	CP000521.1	233288	233288	G	T	A1S_0210	het	het
SNV	CP000521.1	233318	233318	C	A	A1S_0210	het	het
SNV	CP000521.1	233354	233354	T	C	A1S_0210	het	het
SNV	CP000521.1	233360	233360	G	A	A1S_0210	het	het
SNV	CP000521.1	233381	233381	C	T	A1S_0210	het	het
SNV	CP000521.1	233382	233382	C	A	A1S_0210	het	het
SNV	CP000521.1	233399	233399	A	G	A1S_0210	het	het
SNV	CP000521.1	233417	233417	C	T	A1S_0210	het	het
SNV	CP000521.1	233420	233420	G	A	A1S_0210	het	het
SNV	CP000521.1	233435	233435	C	T	A1S_0210	het	het
SNV	CP000521.1	233456	233456	C	G	A1S_0210	het	het
SNV	CP000521.1	233457	233457	T	C	A1S_0210	het	het
SNV	CP000521.1	233483	233483	A	G	A1S_0210	het	het
SNV	CP000521.1	233492	233492	T	A	A1S_0210	het	het
SNV	CP000521.1	233495	233495	G	A	A1S_0210	het	het
SNV	CP000521.1	233534	233534	A	G	A1S_0210	het	het
SNV	CP000521.1	233537	233537	G	A	A1S_0210	het	het
SNV	CP000521.1	233555	233555	G	T	A1S_0210	het	het
SNV	CP000521.1	233579	233579	C	T	A1S_0210	het	het
SNV	CP000521.1	233588	233588	A	G	A1S_0210	het	het
SNV	CP000521.1	233594	233594	C	A	A1S_0210	het	het
SNV	CP000521.1	233609	233609	C	A	A1S_0210	het	het
SNV	CP000521.1	233612	233612	A	T	A1S_0210	het	het
SNV	CP000521.1	233615	233615	C	T	A1S_0210	het	het
SNV	CP000521.1	233642	233642	G	A	A1S_0210	het	het
SNV	CP000521.1	233660	233660	T	A	A1S_0210	het	het
SNV	CP000521.1	233732	233732	T	C	A1S_0210	het	het
SNV	CP000521.1	233753	233753	A	G	A1S_0210	het	het
SNV	CP000521.1	233777	233777	C	A	A1S_0210	het	het
SNV	CP000521.1	233789	233789	A	G	A1S_0210	het	het
SNV	CP000521.1	233816	233816	G	C	A1S_0210	het	het
SNV	CP000521.1	233849	233849	G	A	A1S_0210	het	het
SNV	CP000521.1	233855	233855	A	G	A1S_0210	het	het
SNV	CP000521.1	233899	233899	A	T	A1S_0210	het	het
SNV	CP000521.1	233924	233924	T	C	A1S_0210	het	het
SNV	CP000521.1	233927	233927	C	T	A1S_0210	het	het
SNV	CP000521.1	233968	233968	A	G	A1S_0210	het	het
SNV	CP000521.1	233969	233969	G	A	A1S_0210	het	het
SNV	CP000521.1	233975	233975	T	A	A1S_0210	het	het
SNV	CP000521.1	234041	234041	G	A	A1S_0210	het	het
SNV	CP000521.1	234053	234053	T	G	A1S_0210	het	het
SNV	CP000521.1	234056	234056	A	G	A1S_0210	het	het
SNV	CP000521.1	234069	234069	A	C	A1S_0210	het	het
SNV	CP000521.1	234121	234121	C	A	A1S_0210	het	het
SNV	CP000521.1	234140	234140	T	A	A1S_0210	het	het
SNV	CP000521.1	234182	234182	T	C	A1S_0210	het	het
SNV	CP000521.1	234230	234230	C	T	A1S_0210	het	het
SNV	CP000521.1	234245	234245	C	T	A1S_0211,A1S_0212(dist=2);A1S_0210(dist=3)	het	het
SNV	CP000521.1	234246	234246	A	G	A1S_0211,A1S_0212(dist=1);A1S_0210(dist=4)	het	het
SNV	CP000521.1	234262	234262	C	T	A1S_0211	het	het
SNV	CP000521.1	234327	234327	T	C	A1S_0211	het	het
SNV	CP000521.1	234334	234334	A	C	A1S_0211	-	het
SNV	CP000521.1	234372	234372	C	A	A1S_0211	het	het
SNV	CP000521.1	273249	273249	G	A	A1S_0246	-	het
SNV	CP000521.1	289905	289905	C	T	A1S_0264	-	het
SNV	CP000521.1	459328	459328	A	T	A1S_0421,A1S_0422(dist=118)	hom	hom
SNV	CP000521.1	521304	521304	G	A	A1S_0480	het	-
SNV	CP000521.1	645133	645133	C	T	A1S_3504	het	-
SNV	CP000521.1	686510	686510	C	A	A1S_0628	hom	hom
SNV	CP000521.1	763287	763287	G	A	A1S_0649	-	hom
SNV	CP000521.1	763567	763567	C	T	A1S_0649	hom	hom
SNV	CP000521.1	791352	791352	T	C	A1S_0666	hom	hom
SNV	CP000521.1	791353	791353	C	T	A1S_0666	hom	hom
SNV	CP000521.1	791357	791357	G	C	A1S_0666	hom	hom
SNV	CP000521.1	792584	792584	C	T	A1S_0666,A1S_0667,A1S_0669(dist=509)	-	hom
SNV	CP000521.1	806621	806621	T	G	A1S_0677(dist=5990),A1S_0682(dist=6045)	het	het
SNV	CP000521.1	860357	860357	C	T	A1S_0729	-	hom
SNV	CP000521.1	877431	877431	G	A	A1S_0742	het	het
SNV	CP000521.1	877440	877440	C	T	A1S_0742	het	het
SNV	CP000521.1	877443	877443	T	C	A1S_0742	het	het
SNV	CP000521.1	877451	877451	C	A	A1S_0742	hom	hom
SNV	CP000521.1	877517	877517	T	C	A1S_0742	het	het
SNV	CP000521.1	877518	877518	T	A	A1S_0742	het	het
SNV	CP000521.1	877554	877554	G	A	A1S_0742	het	het
SNV	CP000521.1	877617	877617	C	T	A1S_0742	het	het
SNV	CP000521.1	877650	877650	T	A	A1S_0742	het	het
SNV	CP000521.1	877653	877653	C	T	A1S_0742	het	het
SNV	CP000521.1	877656	877656	G	A	A1S_0742	het	het
SNV	CP000521.1	877659	877659	T	G	A1S_0742	het	het
SNV	CP000521.1	877661	877661	G	C	A1S_0742	het	het
SNV	CP000521.1	877668	877668	G	A	A1S_0742	het	het
SNV	CP000521.1	877671	877671	C	T	A1S_0742	het	het
SNV	CP000521.1	877675	877675	T	C	A1S_0742	het	het
SNV	CP000521.1	877677	877677	G	A	A1S_0742	het	het
SNV	CP000521.1	877678	877678	A	G	A1S_0742	het	het
SNV	CP000521.1	877679	877679	A	G	A1S_0742	het	het
SNV	CP000521.1	877681	877681	G	C	A1S_0742	het	het
SNV	CP000521.1	877683	877683	C	G	A1S_0742	het	het
SNV	CP000521.1	877683	877683	C	T	A1S_0742	het	het
SNV	CP000521.1	877685	877685	A	G	A1S_0742	het	het
SNV	CP000521.1	877686	877686	T	C	A1S_0742	het	het
SNV	CP000521.1	877689	877689	T	C	A1S_0742	het	het
SNV	CP000521.1	877692	877692	G	C	A1S_0742	het	het
SNV	CP000521.1	877695	877695	C	T	A1S_0742	het	het
SNV	CP000521.1	877701	877701	G	A	A1S_0742	het	het
SNV	CP000521.1	877704	877704	C	T	A1S_0742	het	het
SNV	CP000521.1	877707	877707	C	T	A1S_0742	het	het
SNV	CP000521.1	877710	877710	C	T	A1S_0742	-	het
SNV	CP000521.1	877722	877722	C	A	A1S_0742	-	het
SNV	CP000521.1	877722	877722	C	G	A1S_0742	het	-
SNV	CP000521.1	877759	877759	G	A	A1S_0742	het	het
SNV	CP000521.1	877760	877760	T	C	A1S_0742	het	het
SNV	CP000521.1	877762	877762	A	T	A1S_0742	het	het
SNV	CP000521.1	877766	877766	C	A	A1S_0742	het	het
SNV	CP000521.1	877831	877831	A	G	A1S_0742	het	het
SNV	CP000521.1	877878	877878	G	A	A1S_0742	het	het
SNV	CP000521.1	877908	877908	C	T	A1S_0742	-	het
SNV	CP000521.1	1074992	1074992	C	A	A1S_0924(dist=105);A1S_0925,A1S_0926,A1S_0927(dist=4)	hom	hom
SNV	CP000521.1	1076891	1076891	G	T	A1S_0927	hom	hom
SNV	CP000521.1	1093717	1093717	G	A	A1S_0942,A1S_0943,A1S_0944(dist=24)	hom	hom
SNV	CP000521.1	1147577	1147577	C	A	A1S_0990	het	het
SNV	CP000521.1	1147579	1147579	C	T	A1S_0990	het	het
SNV	CP000521.1	1147595	1147595	T	C	A1S_0990	het	het
SNV	CP000521.1	1147597	1147597	A	G	A1S_0990	het	het
SNV	CP000521.1	1148509	1148509	T	C	A1S_0990	het	het
SNV	CP000521.1	1148510	1148510	C	A	A1S_0990	het	het
SNV	CP000521.1	1148515	1148515	A	C	A1S_0990	het	het
SNV	CP000521.1	1148518	1148518	C	T	A1S_0990	het	het
SNV	CP000521.1	1148521	1148521	T	G	A1S_0990	het	het
SNV	CP000521.1	1148527	1148527	A	T	A1S_0990	het	het
SNV	CP000521.1	1148532	1148532	G	A	A1S_0990	het	het
SNV	CP000521.1	1148533	1148533	T	A	A1S_0990	het	het
SNV	CP000521.1	1148540	1148540	C	A	A1S_0990	het	het
SNV	CP000521.1	1148542	1148542	A	T	A1S_0990	het	het
SNV	CP000521.1	1148545	1148545	A	T	A1S_0990	het	het
SNV	CP000521.1	1148546	1148546	C	T	A1S_0990	het	het
SNV	CP000521.1	1148548	1148548	C	A	A1S_0990	het	het
SNV	CP000521.1	1148560	1148560	G	A	A1S_0990	het	het
SNV	CP000521.1	1148569	1148569	T	C	A1S_0990	het	het
SNV	CP000521.1	1148578	1148578	C	T	A1S_0990	het	het
SNV	CP000521.1	1148581	1148581	A	C	A1S_0990	het	het
SNV	CP000521.1	1148582	1148582	G	A	A1S_0990	het	het
SNV	CP000521.1	1148593	1148593	T	C	A1S_0990	het	het
SNV	CP000521.1	1148596	1148596	T	A	A1S_0990	het	het
SNV	CP000521.1	1148600	1148600	G	C	A1S_0990	het	het
SNV	CP000521.1	1148614	1148614	C	T	A1S_0990	het	het
SNV	CP000521.1	1148638	1148638	G	C	A1S_0990	het	-
SNV	CP000521.1	1148644	1148644	A	T	A1S_0990	het	-
SNV	CP000521.1	1148650	1148650	A	G	A1S_0990	het	-
SNV	CP000521.1	1148653	1148653	A	G	A1S_0990	het	-
SNV	CP000521.1	1151791	1151791	A	T	A1S_0993	hom	hom
SNV	CP000521.1	1175602	1175602	T	G	A1S_1016	hom	hom
SNV	CP000521.1	1250326	1250326	C	T	A1S_1073	het	het
SNV	CP000521.1	1261971	1261971	G	T	A1S_1081(dist=28);A1S_3598,A1S_3599(dist=28)	hom	hom
SNV	CP000521.1	1334078	1334078	A	C	A1S_3603	hom	-
SNV	CP000521.1	1334126	1334126	C	A	A1S_3603	hom	hom
SNV	CP000521.1	1334207	1334207	T	A	A1S_3604	hom	hom
SNV	CP000521.1	1334272	1334272	A	T	A1S_3604	hom	hom
SNV	CP000521.1	1334329	1334329	T	G	A1S_3604	hom	hom
SNV	CP000521.1	1334365	1334365	T	A	A1S_3604	hom	hom
SNV	CP000521.1	1405425	1405425	G	C	A1S_1200	hom	hom
SNV	CP000521.1	1405545	1405545	C	T	A1S_1200	het	het
SNV	CP000521.1	1405547	1405547	A	C	A1S_1200	het	het
SNV	CP000521.1	1405569	1405569	C	A	A1S_1200	het	het
SNV	CP000521.1	1405848	1405848	C	T	A1S_1200	het	-
SNV	CP000521.1	1405860	1405860	T	C	A1S_1200	het	-
SNV	CP000521.1	1405875	1405875	C	A	A1S_1200	het	het
SNV	CP000521.1	1405931	1405931	C	T	A1S_1200	het	het
SNV	CP000521.1	1405962	1405962	A	G	A1S_1200	het	het
SNV	CP000521.1	1405965	1405965	C	G	A1S_1200	het	het
SNV	CP000521.1	1406031	1406031	T	C	A1S_1200	het	het
SNV	CP000521.1	1406034	1406034	A	G	A1S_1200	het	het
SNV	CP000521.1	1406055	1406055	G	A	A1S_1200	het	het
SNV	CP000521.1	1406094	1406094	G	A	A1S_1200	het	het
SNV	CP000521.1	1406347	1406347	A	T	A1S_1201	hom	hom
SNV	CP000521.1	1406359	1406359	T	C	A1S_1201	hom	hom
SNV	CP000521.1	1406477	1406477	G	A	A1S_1201	-	het
SNV	CP000521.1	1406519	1406519	G	A	A1S_1201	het	het
SNV	CP000521.1	1406537	1406537	T	C	A1S_1201	het	het
SNV	CP000521.1	1406570	1406570	C	A	A1S_1201	het	het
SNV	CP000521.1	1406615	1406615	G	A	A1S_1201	het	het
SNV	CP000521.1	1406630	1406630	C	T	A1S_1201	het	het
SNV	CP000521.1	1406681	1406681	A	G	A1S_1201	het	het
SNV	CP000521.1	1441387	1441387	A	T	A1S_1230,A1S_1231(dist=146)	hom	hom
SNV	CP000521.1	1510161	1510161	C	T	A1S_1286	-	hom
SNV	CP000521.1	1512001	1512001	C	T	A1S_1288	het	het
SNV	CP000521.1	1512056	1512056	G	A	A1S_1288	het	het
SNV	CP000521.1	1512079	1512079	C	T	A1S_1288	het	het
SNV	CP000521.1	1512091	1512091	A	C	A1S_1288	het	het
SNV	CP000521.1	1512092	1512092	C	T	A1S_1288	het	het
SNV	CP000521.1	1512094	1512094	G	A	A1S_1288	het	het
SNV	CP000521.1	1512098	1512098	T	C	A1S_1288	het	het
SNV	CP000521.1	1512184	1512184	G	C	A1S_1288	het	het
SNV	CP000521.1	1527164	1527164	A	C	A1S_1302	hom	hom
SNV	CP000521.1	1552490	1552490	G	A	A1S_1324	hom	-
SNV	CP000521.1	1558646	1558646	G	A	A1S_1331(dist=123);A1S_1332(dist=33)	hom	-
SNV	CP000521.1	1559203	1559203	G	A	A1S_1332	hom	-
SNV	CP000521.1	1561979	1561979	G	T	A1S_1333	hom	hom
SNV	CP000521.1	1585215	1585215	G	A	A1S_1353	hom	-
SNV	CP000521.1	1601651	1601651	T	A	A1S_1367,A1S_1368,A1S_1369(dist=66)	hom	hom
SNV	CP000521.1	1601654	1601654	A	T	A1S_1367,A1S_1368,A1S_1369(dist=63)	hom	hom
SNV	CP000521.1	1670026	1670026	C	T	A1S_1429	hom	-
SNV	CP000521.1	1699087	1699087	T	C	A1S_1458,A1S_1459,A1S_3668(dist=79);A1S_1456,A1S_1457(dist=341)	hom	hom
SNV	CP000521.1	1699138	1699138	G	A	A1S_1458,A1S_1459,A1S_1460,A1S_3668(dist=28);A1S_1456,A1S_1457(dist=392)	hom	hom
SNV	CP000521.1	1699153	1699153	C	T	A1S_1458,A1S_1459,A1S_1460,A1S_3668(dist=13);A1S_1456,A1S_1457(dist=407)	hom	hom
SNV	CP000521.1	1699228	1699228	A	G	A1S_1458	hom	hom
SNV	CP000521.1	1699246	1699246	C	T	A1S_1458	hom	hom
SNV	CP000521.1	1699288	1699288	C	T	A1S_1458	hom	hom
SNV	CP000521.1	1699447	1699447	C	T	A1S_1458	hom	het
SNV	CP000521.1	1699521	1699521	C	T	A1S_1458	het	het
SNV	CP000521.1	1699778	1699778	G	C	A1S_1459	-	hom
SNV	CP000521.1	1699781	1699781	T	C	A1S_1459	-	hom
SNV	CP000521.1	1699812	1699812	G	A	A1S_1459	-	hom
SNV	CP000521.1	1699868	1699868	G	T	A1S_1459	-	hom
SNV	CP000521.1	1699883	1699883	A	G	A1S_1459	hom	hom
SNV	CP000521.1	1699895	1699895	G	A	A1S_1459	hom	hom
SNV	CP000521.1	1699988	1699988	C	T	A1S_1459	hom	hom
SNV	CP000521.1	1736140	1736140	C	T	A1S_1490(dist=143);A1S_1489(dist=394)	hom	hom
SNV	CP000521.1	1782907	1782907	T	C	A1S_1530(dist=91);A1S_1531(dist=316)	hom	hom
SNV	CP000521.1	1792081	1792081	G	A	A1S_1540	-	hom
SNV	CP000521.1	1799260	1799260	A	C	A1S_1546	hom	hom
SNV	CP000521.1	1862343	1862343	G	A	A1S_3704	hom	hom
SNV	CP000521.1	1870450	1870450	A	G	A1S_1607	hom	hom
SNV	CP000521.1	1904060	1904060	A	T	A1S_1638	hom	hom
SNV	CP000521.1	2148769	2148769	C	T	A1S_1847	hom	-
SNV	CP000521.1	2157019	2157019	G	C	A1S_1854	hom	hom
SNV	CP000521.1	2192708	2192708	G	A	A1S_1891	hom	hom
SNV	CP000521.1	2192711	2192711	C	T	A1S_1891	hom	hom
SNV	CP000521.1	2193096	2193096	C	T	A1S_1891	hom	hom
SNV	CP000521.1	2193191	2193191	A	G	A1S_1891	hom	hom
SNV	CP000521.1	2193320	2193320	G	A	A1S_1890,A1S_1891(dist=1);A1S_1892,A1S_1893(dist=170)	hom	hom
SNV	CP000521.1	2193335	2193335	A	T	A1S_1890,A1S_1891(dist=16);A1S_1892,A1S_1893(dist=155)	hom	hom
SNV	CP000521.1	2193341	2193341	T	C	A1S_1890,A1S_1891(dist=22);A1S_1892,A1S_1893(dist=149)	hom	hom
SNV	CP000521.1	2193344	2193344	C	T	A1S_1890,A1S_1891(dist=25);A1S_1892,A1S_1893(dist=146)	hom	hom
SNV	CP000521.1	2193346	2193346	A	G	A1S_1890,A1S_1891(dist=27);A1S_1892,A1S_1893(dist=144)	hom	hom
SNV	CP000521.1	2193347	2193347	G	A	A1S_1890,A1S_1891(dist=28);A1S_1892,A1S_1893(dist=143)	hom	hom
SNV	CP000521.1	2193350	2193350	G	C	A1S_1890,A1S_1891(dist=31);A1S_1892,A1S_1893(dist=140)	hom	hom
SNV	CP000521.1	2193368	2193368	A	G	A1S_1890,A1S_1891(dist=49);A1S_1892,A1S_1893,A1S_1894(dist=122)	hom	hom
SNV	CP000521.1	2243186	2243186	A	C	A1S_1936,A1S_1939(dist=30);A1S_1937,A1S_1938(dist=30)	hom	hom
SNV	CP000521.1	2243187	2243187	C	A	A1S_1936,A1S_1939(dist=29);A1S_1937,A1S_1938(dist=29)	hom	hom
SNV	CP000521.1	2286491	2286491	A	G	A1S_1973	hom	hom
SNV	CP000521.1	2322896	2322896	A	T	A1S_2007	hom	hom
SNV	CP000521.1	2404500	2404500	T	C	A1S_3780	hom	hom
SNV	CP000521.1	2452857	2452857	G	T	A1S_2101	hom	hom
SNV	CP000521.1	2452858	2452858	T	G	A1S_2101	hom	hom
SNV	CP000521.1	2460574	2460574	C	T	A1S_2107,A1S_2108(dist=83)	hom	hom
SNV	CP000521.1	2460583	2460583	G	T	A1S_2107,A1S_2108(dist=74)	hom	hom
SNV	CP000521.1	2460585	2460585	T	G	A1S_2107,A1S_2108(dist=72)	hom	hom
SNV	CP000521.1	2582274	2582274	A	T	A1S_2218,A1S_3796(dist=63);A1S_2219(dist=63)	hom	hom
SNV	CP000521.1	2745350	2745350	C	T	A1S_2369	hom	hom
SNV	CP000521.1	2814760	2814760	A	T	A1S_2429	hom	hom
SNV	CP000521.1	2896159	2896159	T	A	A1S_2498	hom	hom
SNV	CP000521.1	2906685	2906685	T	C	A1S_2506	hom	hom
SNV	CP000521.1	2906686	2906686	C	A	A1S_2506	hom	hom
SNV	CP000521.1	2950285	2950285	T	C	A1S_2554,A1S_2555,A1S_3814(dist=202);A1S_2553(dist=172)	hom	hom
SNV	CP000521.1	2950324	2950324	A	G	A1S_2554,A1S_2555,A1S_3814(dist=163);A1S_2553(dist=211)	hom	hom
SNV	CP000521.1	2950336	2950336	A	G	A1S_2554,A1S_2555,A1S_3814(dist=151);A1S_2553(dist=223)	hom	hom
SNV	CP000521.1	2950342	2950342	T	A	A1S_2554,A1S_2555,A1S_3814(dist=145);A1S_2553(dist=229)	hom	hom
SNV	CP000521.1	2950835	2950835	A	G	A1S_2554	hom	hom
SNV	CP000521.1	2950838	2950838	G	A	A1S_2554	hom	hom
SNV	CP000521.1	2950843	2950843	G	A	A1S_2554	hom	hom
SNV	CP000521.1	3098204	3098204	G	A	A1S_2671	hom	hom
SNV	CP000521.1	3128967	3128967	T	C	A1S_2696	het	het
SNV	CP000521.1	3128991	3128991	G	A	A1S_2696	het	het
SNV	CP000521.1	3128992	3128992	T	C	A1S_2696	het	het
SNV	CP000521.1	3129000	3129000	T	C	A1S_2696	het	het
SNV	CP000521.1	3129006	3129006	G	A	A1S_2696	het	het
SNV	CP000521.1	3129024	3129024	T	C	A1S_2696	het	het
SNV	CP000521.1	3129105	3129105	G	A	A1S_2696	het	het
SNV	CP000521.1	3129117	3129117	A	G	A1S_2696	het	het
SNV	CP000521.1	3129141	3129141	T	C	A1S_2696	het	het
SNV	CP000521.1	3130125	3130125	G	A	A1S_2697	hom	hom
SNV	CP000521.1	3220250	3220250	G	A	A1S_2778	-	hom
SNV	CP000521.1	3309200	3309200	A	G	A1S_2860,A1S_2861,A1S_2862(dist=53)	hom	hom
SNV	CP000521.1	3309201	3309201	G	C	A1S_2860,A1S_2861,A1S_2862(dist=52)	hom	hom
SNV	CP000521.1	3309219	3309219	A	G	A1S_2860,A1S_2861,A1S_2862(dist=34)	hom	hom
SNV	CP000521.1	3309221	3309221	A	C	A1S_2860,A1S_2861,A1S_2862(dist=32)	hom	hom
SNV	CP000521.1	3357559	3357559	G	A	A1S_2905	-	hom
SNV	CP000521.1	3379249	3379249	A	T	A1S_2914,A1S_2915,A1S_2916,A1S_2917(dist=48)	hom	hom
SNV	CP000521.1	3379250	3379250	T	A	A1S_2914,A1S_2915,A1S_2916,A1S_2917(dist=47)	hom	hom
SNV	CP000521.1	3430417	3430417	C	A	A1S_2946,A1S_2947,A1S_2948,A1S_2949,A1S_2950,A1S_3861(dist=25)	hom	hom
SNV	CP000521.1	3430419	3430419	A	T	A1S_2946,A1S_2947,A1S_2948,A1S_2949,A1S_2950,A1S_3861(dist=23)	hom	hom
SNV	CP000521.1	3430428	3430428	G	T	A1S_2946,A1S_2947,A1S_2948,A1S_2949,A1S_2950,A1S_3861(dist=14)	hom	hom
SNV	CP000521.1	3430430	3430430	A	T	A1S_2946,A1S_2947,A1S_2948,A1S_2949,A1S_2950,A1S_3861(dist=12)	hom	hom
SNV	CP000521.1	3430432	3430432	T	G	A1S_2946,A1S_2947,A1S_2948,A1S_2949,A1S_2950,A1S_3861(dist=10)	hom	hom
SNV	CP000521.1	3500309	3500309	T	C	A1S_3013,A1S_3014(dist=119)	het	-
SNV	CP000521.1	3500531	3500531	C	T	A1S_3013,A1S_3014(dist=341)	het	-
SNV	CP000521.1	3631552	3631552	C	T	A1S_3144	hom	hom
SNV	CP000521.1	3631553	3631553	A	C	A1S_3144	hom	hom
SNV	CP000521.1	3723224	3723224	C	T	A1S_3229	-	hom
SNV	CP000521.1	3734861	3734861	C	T	A1S_3244	-	hom
SNV	CP000521.1	3735486	3735486	G	A	A1S_3244	hom	-
SNV	CP000521.1	3742196	3742196	C	A	A1S_3252(dist=720);A1S_3253,A1S_3254(dist=35)	hom	hom
SNV	CP000521.1	3794200	3794200	C	T	A1S_3300	hom	hom
SNV	CP000521.1	3812367	3812367	C	T	A1S_3316	-	hom
SNV	CP000521.1	3826366	3826366	C	T	A1S_3327	-	hom
SNV	CP000521.1	3834335	3834335	C	T	A1S_3332	hom	hom
SNV	CP000521.1	3837626	3837626	C	T	A1S_3335	-	hom
SNV	P3	2735	2735	T	A	NONE(dist=NONE),NONE(dist=NONE)	hom	hom
SNV	P3	6574	6574	G	A	NONE(dist=NONE),NONE(dist=NONE)	hom	-
INDEL	CP000521.1	24320	24320	-	A	A1S_0017(dist=694)	hom	hom
INDEL	CP000521.1	25695	25695	T	-	A1S_0018	hom	hom
INDEL	CP000521.1	30365	30365	-	T	A1S_0020,A1S_0023(dist=442)	hom	hom
INDEL	CP000521.1	43501	43501	-	T	A1S_0035,A1S_0036,A1S_0037(dist=218);A1S_0038(dist=218)	hom	hom
INDEL	CP000521.1	48200	48200	T	-	A1S_0041	hom	hom
INDEL	CP000521.1	65812	65812	T	-	A1S_0056	hom	hom
INDEL	CP000521.1	65840	65840	-	T	A1S_0056	hom	hom
INDEL	CP000521.1	74349	74349	T	-	A1S_3484	hom	hom
INDEL	CP000521.1	74647	74647	-	A	A1S_0063,A1S_0064(dist=114);A1S_0062,A1S_3484(dist=268)	hom	hom
INDEL	CP000521.1	89649	89649	-	A	A1S_0076(dist=634);A1S_0073(dist=795)	hom	hom
INDEL	CP000521.1	89766	89766	T	-	A1S_0076(dist=517);A1S_0073(dist=912)	hom	hom
INDEL	CP000521.1	89779	89779	C	-	A1S_0076(dist=504);A1S_0073(dist=925)	hom	hom
INDEL	CP000521.1	89811	89811	T	-	A1S_0076(dist=472);A1S_0073(dist=957)	hom	hom
INDEL	CP000521.1	96263	96263	-	T	A1S_0078	hom	hom
INDEL	CP000521.1	96688	96688	-	TTGTAT	A1S_0079(dist=339);A1S_0078,A1S_3485(dist=61)	hom	hom
INDEL	CP000521.1	101768	101768	C	-	A1S_0081(dist=984)	hom	hom
INDEL	CP000521.1	101775	101775	G	-	A1S_0081(dist=991)	hom	hom
INDEL	CP000521.1	101797	101797	G	-	A1S_0081(dist=1013),A1S_0086(dist=2022)	hom	hom
INDEL	CP000521.1	102300	102300	T	-	A1S_0081(dist=1516),A1S_0086(dist=1519)	hom	hom
INDEL	CP000521.1	102351	102351	T	-	A1S_0081(dist=1567),A1S_0086(dist=1468)	hom	hom
INDEL	CP000521.1	102393	102393	C	-	A1S_0081(dist=1609),A1S_0086(dist=1426)	hom	hom
INDEL	CP000521.1	102434	102434	C	-	A1S_0081(dist=1650),A1S_0086(dist=1385)	hom	hom
INDEL	CP000521.1	102455	102455	-	C	A1S_0081(dist=1671),A1S_0086(dist=1364)	hom	hom
INDEL	CP000521.1	105457	105457	-	A	A1S_0086(dist=808)	hom	hom
INDEL	CP000521.1	107640	107640	T	-	A1S_0087,A1S_0088(dist=403)	hom	hom
INDEL	CP000521.1	107655	107655	T	-	A1S_0087,A1S_0088(dist=388)	hom	hom
INDEL	CP000521.1	122902	122902	-	A	A1S_0103(dist=316)	hom	hom
INDEL	CP000521.1	149266	149266	-	A	A1S_0122,A1S_0123(dist=321);A1S_0118,A1S_0119(dist=201)	hom	hom
INDEL	CP000521.1	160497	160497	-	A	A1S_0136(dist=22);A1S_0134,A1S_0135,A1S_0137(dist=22)	hom	hom
INDEL	CP000521.1	162598	162598	-	T	A1S_0137(dist=741)	hom	hom
INDEL	CP000521.1	163696	163696	-	GT	A1S_0140(dist=598)	hom	hom
INDEL	CP000521.1	178760	178760	-	CACCTT	A1S_0156,A1S_0157,A1S_0158,A1S_0159(dist=30)	hom	hom
INDEL	CP000521.1	178762	178762	-	G	A1S_0156,A1S_0157,A1S_0158,A1S_0159(dist=28)	hom	hom
INDEL	CP000521.1	178766	178766	-	C	A1S_0156,A1S_0157,A1S_0158,A1S_0159(dist=24)	hom	hom
INDEL	CP000521.1	183535	183535	-	A	A1S_0163	hom	hom
INDEL	CP000521.1	188771	188771	G	-	A1S_0170	hom	hom
INDEL	CP000521.1	193299	193299	A	-	A1S_0173(dist=473)	het	het
INDEL	CP000521.1	198673	198673	-	C	A1S_0176,A1S_0177(dist=132)	hom	hom
INDEL	CP000521.1	219217	219217	G	-	A1S_0193(dist=1852),A1S_0198(dist=2541)	hom	hom
INDEL	CP000521.1	219260	219260	C	-	A1S_0193(dist=1895),A1S_0198(dist=2498)	hom	hom
INDEL	CP000521.1	221520	221520	A	-	A1S_0199(dist=238);A1S_0198(dist=238)	hom	hom
INDEL	CP000521.1	221545	221545	A	-	A1S_0199(dist=213);A1S_0198(dist=213)	hom	hom
INDEL	CP000521.1	227227	227227	T	-	A1S_0203	hom	hom
INDEL	CP000521.1	227244	227244	A	-	A1S_0203	hom	hom
INDEL	CP000521.1	227247	227247	T	-	A1S_0203	hom	hom
INDEL	CP000521.1	227260	227260	T	-	A1S_0203	hom	hom
INDEL	CP000521.1	227262	227262	T	-	A1S_0203	hom	hom
INDEL	CP000521.1	227297	227297	G	-	A1S_0203	hom	hom
INDEL	CP000521.1	233080	233080	-	A	A1S_0209	hom	hom
INDEL	CP000521.1	233990	233993	AAGT	-	A1S_0210	het	het
INDEL	CP000521.1	233996	233996	-	TGGG	A1S_0210	-	het
INDEL	CP000521.1	245274	245274	-	A	A1S_0217,A1S_0219(dist=6);A1S_0218(dist=60)	hom	hom
INDEL	CP000521.1	259143	259143	-	T	A1S_0233	hom	hom
INDEL	CP000521.1	259453	259453	T	-	A1S_0234	hom	hom
INDEL	CP000521.1	273651	273651	T	-	A1S_0247	hom	hom
INDEL	CP000521.1	283998	283998	T	-	A1S_0256,A1S_0257,A1S_0258,A1S_0259(dist=93)	hom	hom
INDEL	CP000521.1	284025	284025	-	A	A1S_0256,A1S_0257,A1S_0258,A1S_0259(dist=66)	hom	hom
INDEL	CP000521.1	284627	284627	-	T	A1S_0259	hom	hom
INDEL	CP000521.1	290089	290089	-	AA	A1S_0264	hom	hom
INDEL	CP000521.1	309686	309686	-	A	A1S_0287	hom	hom
INDEL	CP000521.1	314746	314746	A	-	A1S_0290,A1S_3493(dist=34);A1S_0288,A1S_0289,A1S_3492(dist=34)	hom	hom
INDEL	CP000521.1	320541	320541	-	TA	A1S_0293(dist=959)	hom	hom
INDEL	CP000521.1	334524	334524	T	-	A1S_0308(dist=974)	hom	hom
INDEL	CP000521.1	341418	341418	-	TC	A1S_0315,A1S_3494(dist=224);A1S_0312(dist=749)	hom	hom
INDEL	CP000521.1	363779	363779	-	A	A1S_0338(dist=835)	hom	hom
INDEL	CP000521.1	381104	381104	-	A	A1S_0350,A1S_0351,A1S_0352(dist=132)	hom	hom
INDEL	CP000521.1	386228	386228	T	-	A1S_0354	hom	hom
INDEL	CP000521.1	387449	387449	-	A	A1S_0356	hom	hom
INDEL	CP000521.1	410869	410869	-	A	A1S_0374	hom	hom
INDEL	CP000521.1	412748	412748	-	A	A1S_0375(dist=978);A1S_0376,A1S_0378,A1S_3496(dist=691)	hom	hom
INDEL	CP000521.1	413441	413441	A	-	A1S_0378	hom	hom
INDEL	CP000521.1	413449	413449	C	-	A1S_0378	hom	hom
INDEL	CP000521.1	439900	439900	-	T	A1S_0406(dist=428)	hom	hom
INDEL	CP000521.1	459327	459327	C	-	A1S_0421,A1S_0422(dist=119)	hom	hom
INDEL	CP000521.1	497792	497792	-	A	A1S_0459,A1S_0460,A1S_0461(dist=45);A1S_0462(dist=45)	hom	hom
INDEL	CP000521.1	519936	519936	T	-	A1S_0479(dist=151);A1S_0478,A1S_0480(dist=368)	hom	hom
INDEL	CP000521.1	520271	520271	A	-	A1S_0479(dist=486);A1S_0478,A1S_0480(dist=33)	hom	hom
INDEL	CP000521.1	530075	530075	-	TT	A1S_0485	hom	hom
INDEL	CP000521.1	531846	531846	-	T	A1S_0489(dist=846)	hom	hom
INDEL	CP000521.1	532569	532569	-	T	A1S_0489(dist=123)	hom	hom
INDEL	CP000521.1	532624	532624	-	T	A1S_0489(dist=68)	hom	hom
INDEL	CP000521.1	532632	532632	-	G	A1S_0489(dist=60)	hom	hom
INDEL	CP000521.1	536626	536626	-	A	A1S_0491(dist=160);A1S_0492(dist=165)	hom	hom
INDEL	CP000521.1	541071	541071	-	G	A1S_0494	hom	hom
INDEL	CP000521.1	542467	542467	-	C	A1S_0497	hom	hom
INDEL	CP000521.1	553615	553615	T	-	A1S_0509	hom	hom
INDEL	CP000521.1	570643	570643	-	A	A1S_0528,A1S_0529,A1S_0530(dist=9);A1S_0531(dist=88)	hom	hom
INDEL	CP000521.1	574329	574329	A	-	A1S_0533,A1S_0534,A1S_0535(dist=50)	hom	hom
INDEL	CP000521.1	578045	578045	-	A	A1S_0538	hom	hom
INDEL	CP000521.1	581818	581818	T	-	A1S_0542	hom	hom
INDEL	CP000521.1	593371	593371	G	-	A1S_0550(dist=309);A1S_0549(dist=131)	hom	hom
INDEL	CP000521.1	602227	602227	A	-	A1S_3503	hom	hom
INDEL	CP000521.1	604620	604620	A	-	A1S_0557	hom	hom
INDEL	CP000521.1	617566	617566	-	A	A1S_0568,A1S_0569(dist=40)	hom	hom
INDEL	CP000521.1	627158	627158	-	A	A1S_0579(dist=742);A1S_0576(dist=689)	hom	hom
INDEL	CP000521.1	634460	634460	-	T	A1S_0585,A1S_0586,A1S_0587(dist=110);A1S_0583,A1S_0584(dist=72)	hom	hom
INDEL	CP000521.1	634468	634468	-	G	A1S_0585,A1S_0586,A1S_0587(dist=102);A1S_0583,A1S_0584(dist=80)	hom	hom
INDEL	CP000521.1	634955	634955	T	-	A1S_0585	hom	hom
INDEL	CP000521.1	647766	647766	-	T	A1S_0600,A1S_0601(dist=368);A1S_0599(dist=797)	hom	hom
INDEL	CP000521.1	653327	653327	A	-	A1S_0606(dist=923)	hom	hom
INDEL	CP000521.1	662825	662825	-	A	A1S_0612,A1S_0613(dist=115)	hom	hom
INDEL	CP000521.1	674210	674210	-	AGCCAAAAAGCCTAAAAAATGTA	A1S_0622(dist=117);A1S_0623(dist=626)	-	hom
INDEL	CP000521.1	674212	674212	-	CTTGATATGAATTGCTATAAAAAGGGGTTGCAAAGGGGATGAGATGGTCTATAA	A1S_0622(dist=119);A1S_0623(dist=624)	-	hom
INDEL	CP000521.1	677009	677009	A	-	A1S_0623(dist=59);A1S_0624(dist=104)	hom	hom
INDEL	CP000521.1	680045	680045	A	-	A1S_0626	hom	hom
INDEL	CP000521.1	680052	680052	A	-	A1S_0626	hom	hom
INDEL	CP000521.1	680059	680059	A	-	A1S_0626	hom	hom
INDEL	CP000521.1	686423	686423	T	-	A1S_0628	hom	hom
INDEL	CP000521.1	687962	687962	-	T	A1S_3514	hom	hom
INDEL	CP000521.1	690243	690243	-	T	A1S_3517	hom	hom
INDEL	CP000521.1	690900	690900	-	T	A1S_3515,A1S_3516,A1S_3517,A1S_3518(dist=627)	hom	hom
INDEL	CP000521.1	697315	697315	-	A	A1S_0629	hom	hom
INDEL	CP000521.1	718436	718436	-	A	A1S_0634(dist=79);A1S_0633(dist=607)	hom	hom
INDEL	CP000521.1	721531	721531	-	A	A1S_0635(dist=197);A1S_3528(dist=148)	hom	hom
INDEL	CP000521.1	721731	721731	A	-	A1S_0635	hom	hom
INDEL	CP000521.1	723865	723865	-	T	A1S_0637	hom	hom
INDEL	CP000521.1	728741	728741	-	T	A1S_0639(dist=572);A1S_3530,A1S_3531,A1S_3532(dist=225)	hom	hom
INDEL	CP000521.1	729262	729262	-	T	A1S_3531	hom	hom
INDEL	CP000521.1	732413	732413	-	A	A1S_0640(dist=46);A1S_0641(dist=35)	hom	hom
INDEL	CP000521.1	745848	745848	T	-	A1S_3540(dist=3);A1S_0645(dist=7)	hom	hom
INDEL	CP000521.1	754682	754682	-	T	A1S_0647,A1S_3546(dist=27);A1S_0646,A1S_3547(dist=27)	hom	hom
INDEL	CP000521.1	754688	754688	-	T	A1S_0647,A1S_3546(dist=21);A1S_0646,A1S_3547(dist=21)	hom	hom
INDEL	CP000521.1	756675	756675	A	-	A1S_0647	hom	hom
INDEL	CP000521.1	756679	756679	-	T	A1S_0647	hom	hom
INDEL	CP000521.1	756687	756688	AC	-	A1S_0647	hom	hom
INDEL	CP000521.1	767895	767895	-	T	A1S_0650,A1S_3553,A1S_3554(dist=144)	hom	hom
INDEL	CP000521.1	778263	778263	-	A	A1S_0654,A1S_0655(dist=56);A1S_0653(dist=187)	hom	hom
INDEL	CP000521.1	791347	791347	-	T	A1S_0666	hom	hom
INDEL	CP000521.1	791359	791359	-	G	A1S_0666	hom	hom
INDEL	CP000521.1	791364	791364	-	C	A1S_0666	hom	hom
INDEL	CP000521.1	793101	793101	-	A	A1S_0669	hom	hom
INDEL	CP000521.1	794057	794057	C	-	A1S_0670,A1S_0671	hom	hom
INDEL	CP000521.1	797536	797536	-	G	A1S_0673	hom	hom
INDEL	CP000521.1	800617	800617	-	A	A1S_0677	hom	hom
INDEL	CP000521.1	833980	833980	T	-	A1S_0701	hom	hom
INDEL	CP000521.1	835153	835153	-	A	A1S_0703	hom	hom
INDEL	CP000521.1	861171	861171	A	-	A1S_0729,A1S_0730(dist=197)	hom	hom
INDEL	CP000521.1	871610	871610	-	A	A1S_0739(dist=878);A1S_0737,A1S_0738(dist=216)	hom	hom
INDEL	CP000521.1	874441	874447	AACTTTC	-	A1S_0741	hom	hom
INDEL	CP000521.1	877730	877730	-	GGCCT	A1S_0742	-	het
INDEL	CP000521.1	877733	877734	TA	-	A1S_0742	het	het
INDEL	CP000521.1	877740	877740	A	-	A1S_0742	-	het
INDEL	CP000521.1	877754	877754	-	CT	A1S_0742	het	het
INDEL	CP000521.1	877756	877756	-	CAAGTC	A1S_0742	het	het
INDEL	CP000521.1	892094	892094	-	A	A1S_0751,A1S_0752(dist=841)	hom	hom
INDEL	CP000521.1	897781	897781	T	-	A1S_0756	hom	hom
INDEL	CP000521.1	897792	897792	A	-	A1S_0756	hom	hom
INDEL	CP000521.1	897810	897810	T	-	A1S_0756	hom	hom
INDEL	CP000521.1	916774	916774	-	A	A1S_3566	hom	hom
INDEL	CP000521.1	921301	921301	-	A	A1S_0776,A1S_3567,A1S_3568(dist=9);A1S_0777,A1S_0778(dist=9)	hom	hom
INDEL	CP000521.1	932685	932685	-	AAA	A1S_0786	hom	hom
INDEL	CP000521.1	940301	940301	A	-	A1S_0793(dist=493)	hom	hom
INDEL	CP000521.1	940312	940312	A	-	A1S_0793(dist=482)	hom	hom
INDEL	CP000521.1	950884	950884	-	A	A1S_0800,A1S_0801,A1S_3570(dist=74);A1S_0799(dist=179)	hom	hom
INDEL	CP000521.1	951587	951587	-	T	A1S_0801,A1S_0802,A1S_3570(dist=130);A1S_0799,A1S_0800(dist=165)	hom	hom
INDEL	CP000521.1	952236	952236	A	-	A1S_0801	hom	hom
INDEL	CP000521.1	971409	971409	-	T	A1S_3571	hom	hom
INDEL	CP000521.1	974124	974124	T	-	A1S_0827	hom	hom
INDEL	CP000521.1	975787	975787	G	-	A1S_0829(dist=158);A1S_0834,A1S_3573(dist=317)	hom	hom
INDEL	CP000521.1	981923	981923	T	-	A1S_0838,A1S_0839	hom	hom
INDEL	CP000521.1	996562	996562	-	G	A1S_0853	hom	hom
INDEL	CP000521.1	996565	996567	ATG	-	A1S_0853	hom	hom
INDEL	CP000521.1	1000113	1000113	-	T	A1S_0859	hom	hom
INDEL	CP000521.1	1004793	1004793	-	T	A1S_0864	hom	hom
INDEL	CP000521.1	1010211	1010211	-	GGAAGATCATCATGGCTAAAGCCAAGTTTGAACGTAATAAAC	A1S_0869(dist=12);A1S_0868(dist=83)	hom	hom
INDEL	CP000521.1	1023287	1023287	-	A	A1S_0880,A1S_0881(dist=111);A1S_0882(dist=10)	hom	hom
INDEL	CP000521.1	1026221	1026221	-	T	A1S_0883,A1S_0885(dist=156);A1S_0884(dist=37)	hom	hom
INDEL	CP000521.1	1046531	1046531	G	-	A1S_0903	hom	hom
INDEL	CP000521.1	1074988	1074988	-	GT	A1S_0924(dist=101);A1S_0925,A1S_0926,A1S_0927(dist=8)	hom	hom
INDEL	CP000521.1	1074990	1074990	-	C	A1S_0924(dist=103);A1S_0925,A1S_0926,A1S_0927(dist=6)	hom	hom
INDEL	CP000521.1	1074994	1074995	GA	-	A1S_0924(dist=107);A1S_0925,A1S_0926,A1S_0927(dist=1)	hom	hom
INDEL	CP000521.1	1074998	1074998	A	-	A1S_0925	hom	hom
INDEL	CP000521.1	1075276	1075276	T	-	A1S_0926	hom	hom
INDEL	CP000521.1	1076890	1076890	C	-	A1S_0927	hom	hom
INDEL	CP000521.1	1081426	1081426	-	T	A1S_0930	hom	hom
INDEL	CP000521.1	1093718	1093718	-	G	A1S_0942,A1S_0943,A1S_0944(dist=23)	hom	hom
INDEL	CP000521.1	1093724	1093726	ACG	-	A1S_0942,A1S_0943,A1S_0944(dist=15)	hom	hom
INDEL	CP000521.1	1093727	1093727	-	A	A1S_0942,A1S_0943,A1S_0944(dist=14)	hom	hom
INDEL	CP000521.1	1093734	1093734	T	-	A1S_0942,A1S_0943,A1S_0944(dist=7)	hom	hom
INDEL	CP000521.1	1094504	1094504	T	-	A1S_0944	hom	hom
INDEL	CP000521.1	1094794	1094794	-	T	A1S_0944,A1S_0945,A1S_0946,A1S_0947(dist=33)	hom	hom
INDEL	CP000521.1	1098670	1098670	-	A	A1S_0950	hom	hom
INDEL	CP000521.1	1100655	1100655	-	A	A1S_0952	hom	hom
INDEL	CP000521.1	1108352	1108352	-	T	A1S_0960	hom	hom
INDEL	CP000521.1	1114043	1114043	-	A	A1S_3582(dist=168);A1S_0964(dist=103)	hom	hom
INDEL	CP000521.1	1117207	1117207	T	-	A1S_3583,A1S_3584	hom	hom
INDEL	CP000521.1	1130114	1130114	A	-	A1S_0974,A1S_0975	hom	hom
INDEL	CP000521.1	1138269	1138269	-	T	A1S_0980	hom	hom
INDEL	CP000521.1	1139921	1139921	-	T	A1S_0982,A1S_3587(dist=53);A1S_0983(dist=53)	hom	hom
INDEL	CP000521.1	1148563	1148563	A	-	A1S_0990	het	het
INDEL	CP000521.1	1148566	1148566	-	A	A1S_0990	het	het
INDEL	CP000521.1	1148598	1148598	-	GCT	A1S_0990	het	het
INDEL	CP000521.1	1148603	1148605	TTA	-	A1S_0990	het	het
INDEL	CP000521.1	1149141	1149141	A	-	A1S_0990	hom	hom
INDEL	CP000521.1	1149209	1149209	A	-	A1S_0990	hom	hom
INDEL	CP000521.1	1149220	1149220	C	-	A1S_0990	hom	hom
INDEL	CP000521.1	1162771	1162771	-	A	A1S_1003	hom	hom
INDEL	CP000521.1	1166807	1166807	T	-	A1S_1007	hom	hom
INDEL	CP000521.1	1169650	1169650	-	T	A1S_1009	hom	hom
INDEL	CP000521.1	1170586	1170586	-	A	A1S_1009,A1S_1010,A1S_1011(dist=229)	hom	hom
INDEL	CP000521.1	1175601	1175601	A	-	A1S_1016	hom	hom
INDEL	CP000521.1	1175616	1175616	-	A	A1S_1016	hom	hom
INDEL	CP000521.1	1175756	1175756	C	-	A1S_1017,A1S_3589	hom	hom
INDEL	CP000521.1	1190456	1190456	T	-	A1S_1031	hom	hom
INDEL	CP000521.1	1224646	1224646	T	-	A1S_1059	hom	hom
INDEL	CP000521.1	1225336	1225336	A	-	A1S_1060	hom	hom
INDEL	CP000521.1	1233498	1233498	A	-	A1S_1068(dist=162);A1S_1067,A1S_1069,A1S_3594(dist=77)	hom	hom
INDEL	CP000521.1	1233531	1233531	A	-	A1S_1068(dist=195);A1S_1067,A1S_1069,A1S_3594(dist=44)	hom	hom
INDEL	CP000521.1	1233565	1233565	T	-	A1S_1068(dist=229);A1S_1067,A1S_1069,A1S_3594(dist=10)	hom	hom
INDEL	CP000521.1	1233581	1233581	T	-	A1S_1069	hom	hom
INDEL	CP000521.1	1239202	1239202	A	-	A1S_1072(dist=331);A1S_3596(dist=366)	hom	hom
INDEL	CP000521.1	1262155	1262155	-	G	A1S_1081,A1S_3598(dist=30);A1S_3599(dist=30)	hom	hom
INDEL	CP000521.1	1273970	1273970	G	-	A1S_1091	hom	hom
INDEL	CP000521.1	1295648	1295648	T	-	A1S_1107(dist=61);A1S_1108(dist=23)	hom	hom
INDEL	CP000521.1	1295652	1295652	T	-	A1S_1107(dist=65);A1S_1108(dist=19)	hom	hom
INDEL	CP000521.1	1301307	1301307	-	A	A1S_1111,A1S_1112(dist=121)	hom	hom
INDEL	CP000521.1	1311332	1311332	-	A	A1S_1121	hom	hom
INDEL	CP000521.1	1317959	1317959	T	-	A1S_1126	hom	hom
INDEL	CP000521.1	1324684	1324684	-	C	A1S_1133	hom	hom
INDEL	CP000521.1	1326075	1326075	-	T	A1S_1135(dist=709);A1S_1134(dist=320)	hom	hom
INDEL	CP000521.1	1327040	1327040	T	-	A1S_1135	hom	hom
INDEL	CP000521.1	1327085	1327085	T	-	A1S_1136(dist=262);A1S_1135(dist=41)	hom	hom
INDEL	CP000521.1	1359463	1359463	A	-	A1S_1164,A1S_1165	hom	hom
INDEL	CP000521.1	1364748	1364748	A	-	A1S_1169,A1S_1170(dist=470);A1S_1168,A1S_3620(dist=12)	hom	hom
INDEL	CP000521.1	1365457	1365457	-	A	A1S_1169	hom	hom
INDEL	CP000521.1	1379989	1379989	-	A	A1S_3623	hom	hom
INDEL	CP000521.1	1385135	1385135	-	A	A1S_1182	hom	hom
INDEL	CP000521.1	1385755	1385755	C	-	A1S_1181,A1S_1182,A1S_1183,A1S_1184(dist=466)	hom	hom
INDEL	CP000521.1	1385814	1385814	A	-	A1S_1181,A1S_1182,A1S_1183,A1S_1184(dist=407)	hom	hom
INDEL	CP000521.1	1385826	1385826	A	-	A1S_1181,A1S_1182,A1S_1183,A1S_1184(dist=395)	hom	hom
INDEL	CP000521.1	1385833	1385833	T	-	A1S_1181,A1S_1182,A1S_1183,A1S_1184(dist=388)	hom	hom
INDEL	CP000521.1	1392723	1392723	-	A	A1S_1189	hom	hom
INDEL	CP000521.1	1394196	1394196	-	TA	A1S_1189,A1S_1190,A1S_3625(dist=346)	hom	hom
INDEL	CP000521.1	1396861	1396861	-	T	A1S_1191	hom	hom
INDEL	CP000521.1	1399957	1399957	-	T	A1S_1195	hom	hom
INDEL	CP000521.1	1402909	1402909	T	-	A1S_1197	hom	hom
INDEL	CP000521.1	1406256	1406256	G	-	A1S_1200,A1S_1202(dist=56);A1S_1201(dist=56)	hom	hom
INDEL	CP000521.1	1406322	1406322	G	-	A1S_1201	hom	hom
INDEL	CP000521.1	1406521	1406521	-	TA	A1S_1201	het	het
INDEL	CP000521.1	1406524	1406525	GC	-	A1S_1201	het	het
INDEL	CP000521.1	1412365	1412365	-	A	A1S_1206	hom	hom
INDEL	CP000521.1	1440298	1440298	A	-	A1S_1230(dist=253);A1S_3632(dist=601)	hom	hom
INDEL	CP000521.1	1441368	1441368	-	TA	A1S_1230	hom	hom
INDEL	CP000521.1	1445838	1445838	A	-	A1S_3636	hom	hom
INDEL	CP000521.1	1459044	1459044	A	-	A1S_1246,A1S_1247,A1S_1248(dist=99)	hom	hom
INDEL	CP000521.1	1459141	1459141	G	-	A1S_1246,A1S_1247,A1S_1248(dist=2)	hom	hom
INDEL	CP000521.1	1459145	1459145	A	-	A1S_1247	hom	hom
INDEL	CP000521.1	1459153	1459153	-	T	A1S_1247	hom	hom
INDEL	CP000521.1	1463979	1463979	T	-	A1S_1252	hom	hom
INDEL	CP000521.1	1479862	1479862	-	T	A1S_1262,A1S_1263(dist=111);A1S_1264(dist=278)	hom	hom
INDEL	CP000521.1	1483282	1483282	-	T	A1S_1266(dist=339);A1S_1265(dist=28)	hom	hom
INDEL	CP000521.1	1497862	1497862	-	A	A1S_1276	hom	hom
INDEL	CP000521.1	1500489	1500489	-	T	A1S_1277	hom	hom
INDEL	CP000521.1	1504043	1504043	A	-	A1S_1281,A1S_3644	hom	hom
INDEL	CP000521.1	1510446	1510446	-	TA	A1S_1287	hom	hom
INDEL	CP000521.1	1511568	1511568	-	A	A1S_1287,A1S_1288,A1S_3646(dist=398)	hom	hom
INDEL	CP000521.1	1512867	1512867	-	G	A1S_1288	hom	hom
INDEL	CP000521.1	1517488	1517488	-	T	A1S_1291	hom	hom
INDEL	CP000521.1	1519789	1519789	A	-	A1S_1293	hom	hom
INDEL	CP000521.1	1519906	1519906	-	A	A1S_1293	hom	hom
INDEL	CP000521.1	1523594	1523594	-	A	A1S_1298	hom	hom
INDEL	CP000521.1	1523776	1523776	-	A	A1S_1299,A1S_1300(dist=170);A1S_1297,A1S_1298(dist=153)	hom	hom
INDEL	CP000521.1	1530218	1530218	-	A	A1S_1302	hom	hom
INDEL	CP000521.1	1540013	1540013	-	T	A1S_1311	hom	hom
INDEL	CP000521.1	1546034	1546034	-	T	A1S_1318(dist=140);A1S_1317,A1S_1319(dist=173)	hom	hom
INDEL	CP000521.1	1546927	1546927	-	T	A1S_1319,A1S_1320(dist=840)	hom	hom
INDEL	CP000521.1	1547655	1547655	-	T	A1S_1319,A1S_1320,A1S_1321(dist=112)	hom	hom
INDEL	CP000521.1	1555587	1555587	-	A	A1S_1328	hom	hom
INDEL	CP000521.1	1562167	1562167	-	T	A1S_3650	hom	hom
INDEL	CP000521.1	1574856	1574856	T	-	A1S_1345	hom	hom
INDEL	CP000521.1	1577832	1577832	-	A	A1S_3651,A1S_3652(dist=242);A1S_1348,A1S_1349(dist=242)	hom	hom
INDEL	CP000521.1	1578541	1578541	-	A	A1S_3652(dist=187);A1S_1349,A1S_3651,A1S_3653(dist=187)	hom	hom
INDEL	CP000521.1	1593564	1593564	-	A	A1S_1360	hom	hom
INDEL	CP000521.1	1593620	1593620	-	A	A1S_1361,A1S_1362(dist=263);A1S_1359,A1S_1360(dist=32)	hom	hom
INDEL	CP000521.1	1593645	1593645	G	-	A1S_1361,A1S_1362(dist=238);A1S_1359,A1S_1360(dist=57)	hom	hom
INDEL	CP000521.1	1593684	1593684	G	-	A1S_1361,A1S_1362(dist=199);A1S_1359,A1S_1360(dist=96)	hom	hom
INDEL	CP000521.1	1601643	1601643	A	-	A1S_1367	hom	hom
INDEL	CP000521.1	1601662	1601662	A	-	A1S_1367,A1S_1368,A1S_1369(dist=55)	hom	hom
INDEL	CP000521.1	1601665	1601665	A	-	A1S_1367,A1S_1368,A1S_1369(dist=52)	hom	hom
INDEL	CP000521.1	1601679	1601679	C	-	A1S_1367,A1S_1368,A1S_1369(dist=38)	hom	hom
INDEL	CP000521.1	1602213	1602213	A	-	A1S_1369	hom	hom
INDEL	CP000521.1	1602222	1602222	T	-	A1S_1369	hom	hom
INDEL	CP000521.1	1603464	1603464	-	T	A1S_1370	hom	hom
INDEL	CP000521.1	1620424	1620424	-	G	A1S_3656,A1S_3657	hom	hom
INDEL	CP000521.1	1623786	1623786	-	T	A1S_1384	hom	hom
INDEL	CP000521.1	1640776	1640776	A	-	A1S_1396	hom	hom
INDEL	CP000521.1	1643298	1643298	-	A	A1S_1400(dist=59);A1S_1399(dist=179)	hom	hom
INDEL	CP000521.1	1647152	1647152	A	-	A1S_1404	hom	hom
INDEL	CP000521.1	1647404	1647404	T	-	A1S_1405	hom	hom
INDEL	CP000521.1	1653405	1653405	-	A	A1S_1411	hom	hom
INDEL	CP000521.1	1670836	1670836	-	A	A1S_1431	hom	hom
INDEL	CP000521.1	1676914	1676914	-	T	A1S_1435	hom	hom
INDEL	CP000521.1	1677481	1677481	-	A	A1S_1436	hom	hom
INDEL	CP000521.1	1679288	1679288	A	-	A1S_1438	hom	hom
INDEL	CP000521.1	1686799	1686799	-	C	A1S_1445	hom	hom
INDEL	CP000521.1	1698830	1698830	-	C	A1S_1458,A1S_1459,A1S_3668(dist=336);A1S_1456,A1S_1457(dist=84)	hom	hom
INDEL	CP000521.1	1699192	1699192	-	T	A1S_1458	hom	hom
INDEL	CP000521.1	1699195	1699195	-	CT	A1S_1458	hom	hom
INDEL	CP000521.1	1699240	1699241	GC	-	A1S_1458	hom	hom
INDEL	CP000521.1	1699243	1699243	-	TA	A1S_1458	hom	hom
INDEL	CP000521.1	1699448	1699448	-	ATGAAC	A1S_1458	hom	hom
INDEL	CP000521.1	1699612	1699612	-	G	A1S_1458	hom	hom
INDEL	CP000521.1	1700004	1700004	-	A	A1S_1459	hom	hom
INDEL	CP000521.1	1700007	1700007	-	T	A1S_1459	hom	hom
INDEL	CP000521.1	1712118	1712118	G	-	A1S_1467(dist=93);A1S_1468(dist=534)	hom	hom
INDEL	CP000521.1	1712136	1712136	A	-	A1S_1467(dist=111);A1S_1468(dist=516)	hom	hom
INDEL	CP000521.1	1715290	1715290	-	A	A1S_1471,A1S_1472(dist=179);A1S_1469,A1S_1470(dist=66)	hom	hom
INDEL	CP000521.1	1727912	1727912	A	-	A1S_1482,A1S_3672	hom	hom
INDEL	CP000521.1	1743318	1743318	-	A	A1S_1496,A1S_1497,A1S_1499(dist=87);A1S_1498(dist=87)	hom	hom
INDEL	CP000521.1	1743356	1743356	-	A	A1S_1496,A1S_1497,A1S_1499(dist=49);A1S_1498(dist=49)	hom	hom
INDEL	CP000521.1	1746068	1746068	-	T	A1S_3674	hom	hom
INDEL	CP000521.1	1758690	1758690	-	T	A1S_1509,A1S_1510,A1S_3677(dist=868)	hom	hom
INDEL	CP000521.1	1765230	1765230	-	T	A1S_1516	hom	hom
INDEL	CP000521.1	1768046	1768046	-	T	A1S_3679,A1S_3680(dist=192);A1S_1518,A1S_1519(dist=83)	hom	hom
INDEL	CP000521.1	1770673	1770673	A	-	A1S_1520	hom	hom
INDEL	CP000521.1	1773734	1773734	-	T	A1S_1524,A1S_1525(dist=165);A1S_1523,A1S_1526(dist=165)	hom	hom
INDEL	CP000521.1	1781384	1781384	-	T	A1S_1530	hom	hom
INDEL	CP000521.1	1783978	1783978	-	AC	A1S_1531(dist=57);A1S_1532,A1S_1533(dist=42)	hom	hom
INDEL	CP000521.1	1783989	1783989	-	A	A1S_1531(dist=68);A1S_1532,A1S_1533(dist=31)	hom	hom
INDEL	CP000521.1	1783995	1783995	-	T	A1S_1531(dist=74);A1S_1532,A1S_1533(dist=25)	hom	hom
INDEL	CP000521.1	1794865	1794865	-	A	A1S_3681	hom	hom
INDEL	CP000521.1	1796669	1796669	-	T	A1S_1544(dist=81);A1S_1543,A1S_3682(dist=40)	hom	hom
INDEL	CP000521.1	1801169	1801169	T	-	A1S_1547	hom	hom
INDEL	CP000521.1	1827586	1827586	-	C	A1S_1579(dist=51);A1S_1578(dist=122)	hom	hom
INDEL	CP000521.1	1829271	1829271	-	T	A1S_1580(dist=122);A1S_1579,A1S_3683,A1S_3684(dist=122)	hom	hom
INDEL	CP000521.1	1836840	1836840	-	G	A1S_1585	hom	hom
INDEL	CP000521.1	1844009	1844009	G	-	A1S_1587	hom	hom
INDEL	CP000521.1	1851242	1851242	-	A	A1S_3701	hom	hom
INDEL	CP000521.1	1852725	1852725	-	A	A1S_1596	hom	hom
INDEL	CP000521.1	1863395	1863395	-	A	A1S_1601,A1S_3706(dist=151);A1S_1600,A1S_3704,A1S_3705(dist=84)	hom	hom
INDEL	CP000521.1	1870384	1870384	-	T	A1S_1607	hom	hom
INDEL	CP000521.1	1885755	1885755	-	A	A1S_1618(dist=37);A1S_1615,A1S_1616,A1S_1617(dist=37)	hom	hom
INDEL	CP000521.1	1889553	1889553	A	-	A1S_1622,A1S_3710	hom	hom
INDEL	CP000521.1	1894895	1894895	T	-	A1S_1625	hom	hom
INDEL	CP000521.1	1894903	1894904	TT	-	A1S_1625	hom	hom
INDEL	CP000521.1	1894907	1894907	G	-	A1S_1625	hom	hom
INDEL	CP000521.1	1899622	1899622	-	T	A1S_1633	hom	hom
INDEL	CP000521.1	1902836	1902836	T	-	A1S_1638(dist=365);A1S_1636,A1S_1637(dist=35)	hom	hom
INDEL	CP000521.1	1918340	1918340	T	-	A1S_1650	hom	hom
INDEL	CP000521.1	1951892	1951892	T	-	A1S_1676	hom	hom
INDEL	CP000521.1	1955409	1955409	-	T	A1S_3713(dist=370);A1S_1680(dist=138)	hom	hom
INDEL	CP000521.1	1956154	1956154	-	A	A1S_1681(dist=566);A1S_1680,A1S_3713(dist=160)	hom	hom
INDEL	CP000521.1	1956573	1956573	-	A	A1S_1681(dist=147);A1S_1682,A1S_3713(dist=147)	hom	hom
INDEL	CP000521.1	1973873	1973873	-	A	A1S_1697	hom	hom
INDEL	CP000521.1	1981008	1981008	T	-	A1S_1702	hom	hom
INDEL	CP000521.1	1981011	1981011	T	-	A1S_1702	hom	hom
INDEL	CP000521.1	1983441	1983441	-	C	A1S_1706	hom	hom
INDEL	CP000521.1	1994816	1994816	-	T	A1S_1716,A1S_1717,A1S_1718(dist=92)	hom	hom
INDEL	CP000521.1	2007245	2007245	T	-	A1S_1726	hom	hom
INDEL	CP000521.1	2007252	2007252	-	T	A1S_1726	hom	hom
INDEL	CP000521.1	2008427	2008427	-	T	A1S_1726,A1S_1727(dist=909);A1S_3719(dist=179)	hom	hom
INDEL	CP000521.1	2008804	2008804	-	T	A1S_1727(dist=532);A1S_3719(dist=556)	hom	hom
INDEL	CP000521.1	2008812	2008812	-	T	A1S_1727(dist=524);A1S_3719(dist=564)	hom	hom
INDEL	CP000521.1	2016885	2016885	-	A	A1S_1733,A1S_1734(dist=514)	hom	hom
INDEL	CP000521.1	2019813	2019813	T	-	A1S_1735,A1S_1736(dist=725);A1S_3721(dist=260)	hom	hom
INDEL	CP000521.1	2020298	2020298	-	T	A1S_1736(dist=240);A1S_3721(dist=745)	hom	hom
INDEL	CP000521.1	2024976	2024976	A	-	A1S_1740	hom	hom
INDEL	CP000521.1	2040253	2040253	A	-	A1S_1752	hom	hom
INDEL	CP000521.1	2064898	2064898	-	T	A1S_1772	hom	hom
INDEL	CP000521.1	2070123	2070123	-	T	A1S_1776	hom	hom
INDEL	CP000521.1	2074018	2074018	-	A	A1S_1778	hom	hom
INDEL	CP000521.1	2093586	2093586	A	-	A1S_1796	hom	hom
INDEL	CP000521.1	2093591	2093591	C	-	A1S_1796	hom	hom
INDEL	CP000521.1	2093645	2093645	G	-	A1S_1797(dist=145);A1S_1795,A1S_1796(dist=18)	hom	hom
INDEL	CP000521.1	2093653	2093653	A	-	A1S_1797(dist=137);A1S_1795,A1S_1796(dist=26)	hom	hom
INDEL	CP000521.1	2093670	2093670	T	-	A1S_1797(dist=120);A1S_1795,A1S_1796(dist=43)	hom	hom
INDEL	CP000521.1	2093675	2093675	G	-	A1S_1797(dist=115);A1S_1795,A1S_1796(dist=48)	hom	hom
INDEL	CP000521.1	2098001	2098001	A	-	A1S_1800,A1S_1801	hom	hom
INDEL	CP000521.1	2115125	2115125	-	T	A1S_1814	hom	hom
INDEL	CP000521.1	2117684	2117684	-	A	A1S_1816	hom	hom
INDEL	CP000521.1	2119092	2119092	-	G	A1S_1816(dist=37);A1S_1817(dist=120)	hom	hom
INDEL	CP000521.1	2140266	2140266	-	A	A1S_1838	hom	hom
INDEL	CP000521.1	2146241	2146241	A	-	A1S_1843	hom	hom
INDEL	CP000521.1	2149784	2149785	AA	-	A1S_1849	hom	hom
INDEL	CP000521.1	2149786	2149786	-	CG	A1S_1849	hom	hom
INDEL	CP000521.1	2163574	2163574	-	T	A1S_1859	hom	hom
INDEL	CP000521.1	2164808	2164808	-	T	A1S_1861	hom	hom
INDEL	CP000521.1	2171390	2171390	-	A	A1S_1868	hom	hom
INDEL	CP000521.1	2175506	2175506	C	-	A1S_1873	hom	hom
INDEL	CP000521.1	2175509	2175510	AA	-	A1S_1873	hom	hom
INDEL	CP000521.1	2180550	2180550	-	T	A1S_1878,A1S_1879(dist=313);A1S_1880(dist=317)	hom	hom
INDEL	CP000521.1	2189257	2189257	-	A	A1S_1888	hom	hom
INDEL	CP000521.1	2193174	2193174	-	CG	A1S_1891	hom	hom
INDEL	CP000521.1	2193176	2193177	TT	-	A1S_1891	hom	hom
INDEL	CP000521.1	2210832	2210832	A	-	A1S_1908(dist=178);A1S_1909,A1S_1910(dist=250)	hom	hom
INDEL	CP000521.1	2216129	2216129	-	T	A1S_1913,A1S_3745(dist=99)	hom	hom
INDEL	CP000521.1	2257166	2257166	-	G	A1S_1949,A1S_3746(dist=517);A1S_1948(dist=495)	hom	hom
INDEL	CP000521.1	2257555	2257555	-	A	A1S_1949,A1S_3746(dist=128);A1S_1948(dist=884)	hom	hom
INDEL	CP000521.1	2264546	2264546	G	-	A1S_1953,A1S_1954(dist=19)	hom	hom
INDEL	CP000521.1	2264552	2264552	T	-	A1S_1953,A1S_1954(dist=13)	hom	hom
INDEL	CP000521.1	2264569	2264569	-	T	A1S_1954	hom	hom
INDEL	CP000521.1	2264583	2264583	-	T	A1S_1954	hom	hom
INDEL	CP000521.1	2273675	2273675	T	-	A1S_1961	hom	hom
INDEL	CP000521.1	2275273	2275273	-	G	A1S_1963,A1S_1964(dist=27);A1S_1962(dist=27)	hom	hom
INDEL	CP000521.1	2275287	2275287	T	-	A1S_1963,A1S_1964(dist=13);A1S_1962(dist=41)	hom	hom
INDEL	CP000521.1	2289728	2289728	-	AA	A1S_1976,A1S_1977(dist=104)	hom	hom
INDEL	CP000521.1	2310851	2310851	-	T	A1S_3751	hom	hom
INDEL	CP000521.1	2317612	2317612	T	-	A1S_2004	hom	hom
INDEL	CP000521.1	2317648	2317648	T	-	A1S_2004	hom	hom
INDEL	CP000521.1	2317670	2317670	T	-	A1S_2004	hom	hom
INDEL	CP000521.1	2317680	2317680	A	-	A1S_2004	hom	hom
INDEL	CP000521.1	2338087	2338087	-	A	A1S_2017,A1S_3756(dist=115);A1S_3757,A1S_3758(dist=115)	hom	hom
INDEL	CP000521.1	2344491	2344491	-	T	A1S_2018(dist=81);A1S_3759(dist=39)	hom	hom
INDEL	CP000521.1	2344541	2344541	T	-	A1S_3759	hom	hom
INDEL	CP000521.1	2353947	2353947	-	T	A1S_2026	hom	hom
INDEL	CP000521.1	2368961	2368961	-	G	A1S_2036	hom	hom
INDEL	CP000521.1	2385229	2385229	-	T	A1S_2044	hom	hom
INDEL	CP000521.1	2385603	2385603	-	T	A1S_2045	hom	hom
INDEL	CP000521.1	2387862	2387862	T	-	A1S_2049	hom	hom
INDEL	CP000521.1	2396780	2396780	-	AGGTTCAGGTTC	A1S_2056	hom	hom
INDEL	CP000521.1	2415823	2415823	-	T	A1S_2071(dist=83);A1S_3782,A1S_3783(dist=187)	hom	hom
INDEL	CP000521.1	2415856	2415856	-	T	A1S_2071(dist=116);A1S_3782,A1S_3783(dist=154)	hom	hom
INDEL	CP000521.1	2415884	2415884	-	A	A1S_2071,A1S_2072(dist=126);A1S_3782,A1S_3783(dist=126)	hom	hom
INDEL	CP000521.1	2416382	2416382	-	T	A1S_3783	hom	hom
INDEL	CP000521.1	2423218	2423218	-	T	A1S_2077	hom	hom
INDEL	CP000521.1	2430520	2430520	-	T	A1S_2080	hom	hom
INDEL	CP000521.1	2452196	2452196	T	-	A1S_2099	hom	hom
INDEL	CP000521.1	2458779	2458779	-	A	A1S_2105	hom	hom
INDEL	CP000521.1	2460560	2460560	A	-	A1S_2107,A1S_2108(dist=97)	hom	hom
INDEL	CP000521.1	2460569	2460569	-	CA	A1S_2107,A1S_2108(dist=88)	hom	hom
INDEL	CP000521.1	2460573	2460573	A	-	A1S_2107,A1S_2108(dist=84)	hom	hom
INDEL	CP000521.1	2460578	2460579	GT	-	A1S_2107,A1S_2108(dist=78)	hom	hom
INDEL	CP000521.1	2465057	2465057	-	A	A1S_2112	hom	hom
INDEL	CP000521.1	2468830	2468830	-	T	A1S_2115	hom	hom
INDEL	CP000521.1	2480118	2480118	-	A	A1S_2127	hom	hom
INDEL	CP000521.1	2480962	2480962	-	A	A1S_2128	hom	hom
INDEL	CP000521.1	2482776	2482776	A	-	A1S_2130	hom	hom
INDEL	CP000521.1	2486279	2486279	-	A	A1S_2131	hom	hom
INDEL	CP000521.1	2491306	2491306	T	-	A1S_2133	hom	hom
INDEL	CP000521.1	2501430	2501430	-	C	A1S_2142,A1S_3789	hom	hom
INDEL	CP000521.1	2504757	2504757	-	T	A1S_2145	hom	hom
INDEL	CP000521.1	2510563	2510563	T	-	A1S_2151	hom	hom
INDEL	CP000521.1	2516007	2516007	-	T	A1S_2158,A1S_3791(dist=196);A1S_2156,A1S_2157(dist=38)	hom	hom
INDEL	CP000521.1	2535678	2535678	-	A	A1S_2174,A1S_2175(dist=272);A1S_2171,A1S_2172,A1S_2173(dist=63)	hom	hom
INDEL	CP000521.1	2536275	2536275	-	A	A1S_2174	hom	hom
INDEL	CP000521.1	2549620	2549620	A	-	A1S_2187	hom	hom
INDEL	CP000521.1	2552509	2552509	-	AA	A1S_2190	hom	hom
INDEL	CP000521.1	2559780	2559780	T	-	A1S_2198,A1S_3793	hom	hom
INDEL	CP000521.1	2580169	2580169	A	-	A1S_2216	hom	hom
INDEL	CP000521.1	2590156	2590156	-	T	A1S_2224,A1S_2225,A1S_3797(dist=140)	hom	hom
INDEL	CP000521.1	2591282	2591282	-	T	A1S_2225,A1S_3797(dist=215);A1S_2226,A1S_2227(dist=296)	hom	hom
INDEL	CP000521.1	2599367	2599367	-	T	A1S_2233,A1S_2235(dist=3);A1S_2234(dist=3)	hom	hom
INDEL	CP000521.1	2599406	2599406	-	A	A1S_2234	hom	hom
INDEL	CP000521.1	2599409	2599409	-	A	A1S_2234	hom	hom
INDEL	CP000521.1	2599434	2599434	T	-	A1S_2234	hom	hom
INDEL	CP000521.1	2622738	2622738	-	T	A1S_2260,A1S_2261,A1S_2262(dist=403)	hom	hom
INDEL	CP000521.1	2634116	2634116	-	A	A1S_2273	hom	hom
INDEL	CP000521.1	2645327	2645327	-	A	A1S_2281,A1S_2282,A1S_2283(dist=62)	hom	hom
INDEL	CP000521.1	2652055	2652055	-	C	A1S_2287	hom	hom
INDEL	CP000521.1	2652067	2652067	C	-	A1S_2287	hom	hom
INDEL	CP000521.1	2673797	2673797	-	A	A1S_2306,A1S_2307(dist=40)	hom	hom
INDEL	CP000521.1	2673817	2673817	T	-	A1S_2306,A1S_2307(dist=20)	hom	hom
INDEL	CP000521.1	2678352	2678352	-	T	A1S_2311(dist=222);A1S_2309,A1S_3799(dist=71)	hom	hom
INDEL	CP000521.1	2690029	2690029	-	T	A1S_2322,A1S_2323,A1S_2324(dist=560)	hom	hom
INDEL	CP000521.1	2696114	2696114	-	A	A1S_2327,A1S_2328(dist=16)	hom	hom
INDEL	CP000521.1	2699733	2699733	-	A	A1S_2330	hom	hom
INDEL	CP000521.1	2702705	2702705	A	-	A1S_2333,A1S_2334(dist=79);A1S_2332(dist=718)	hom	hom
INDEL	CP000521.1	2702764	2702764	-	T	A1S_2333,A1S_2334(dist=20);A1S_2332(dist=777)	hom	hom
INDEL	CP000521.1	2705885	2705885	T	-	A1S_2337(dist=65);A1S_2335,A1S_2336(dist=70)	hom	hom
INDEL	CP000521.1	2705907	2705907	-	A	A1S_2337(dist=43);A1S_2335,A1S_2336(dist=92)	hom	hom
INDEL	CP000521.1	2712647	2712647	-	A	A1S_2339,A1S_2340,A1S_2341(dist=37)	hom	hom
INDEL	CP000521.1	2712658	2712658	-	A	A1S_2339,A1S_2340,A1S_2341(dist=26)	hom	hom
INDEL	CP000521.1	2713634	2713634	-	A	A1S_2341	hom	hom
INDEL	CP000521.1	2713958	2713958	A	-	A1S_2340,A1S_2341,A1S_2342,A1S_2343(dist=95)	hom	hom
INDEL	CP000521.1	2715597	2715597	-	A	A1S_2347(dist=602);A1S_2342,A1S_2343(dist=14)	hom	hom
INDEL	CP000521.1	2720582	2720582	-	C	A1S_2352	hom	hom
INDEL	CP000521.1	2722082	2722082	T	-	A1S_2352,A1S_2353(dist=111)	hom	hom
INDEL	CP000521.1	2722091	2722091	A	-	A1S_2352,A1S_2353(dist=102)	hom	hom
INDEL	CP000521.1	2729685	2729685	C	-	A1S_2357,A1S_2358	hom	hom
INDEL	CP000521.1	2736404	2736404	-	T	A1S_2364	hom	hom
INDEL	CP000521.1	2752844	2752844	A	-	A1S_2376,A1S_2377	hom	hom
INDEL	CP000521.1	2753432	2753432	A	-	A1S_2378	hom	hom
INDEL	CP000521.1	2759434	2759434	-	G	A1S_2382	hom	hom
INDEL	CP000521.1	2762708	2762708	A	-	A1S_2384,A1S_2385(dist=57)	hom	hom
INDEL	CP000521.1	2769104	2769104	-	A	A1S_2389,A1S_2390(dist=335)	hom	hom
INDEL	CP000521.1	2780770	2780770	-	T	A1S_2397,A1S_3804(dist=330)	hom	hom
INDEL	CP000521.1	2784979	2784979	T	-	A1S_2399,A1S_3805	hom	hom
INDEL	CP000521.1	2789804	2789804	-	T	A1S_2404(dist=184);A1S_2405(dist=64)	hom	hom
INDEL	CP000521.1	2791909	2791909	-	C	A1S_2407	hom	hom
INDEL	CP000521.1	2791913	2791913	-	C	A1S_2407	hom	hom
INDEL	CP000521.1	2791922	2791922	-	T	A1S_2407	hom	hom
INDEL	CP000521.1	2792261	2792261	A	-	A1S_2408	hom	hom
INDEL	CP000521.1	2794605	2794605	-	T	A1S_2410(dist=10);A1S_2411(dist=228)	hom	hom
INDEL	CP000521.1	2801576	2801576	A	-	A1S_2416,A1S_2417,A1S_3806(dist=204);A1S_2418(dist=13)	hom	hom
INDEL	CP000521.1	2801607	2801607	-	A	A1S_2418	hom	hom
INDEL	CP000521.1	2802818	2802818	-	A	A1S_2418(dist=123);A1S_2419(dist=392)	hom	hom
INDEL	CP000521.1	2803166	2803166	A	-	A1S_2418,A1S_2420(dist=44);A1S_2419(dist=44)	hom	hom
INDEL	CP000521.1	2809364	2809364	T	-	A1S_2424	hom	hom
INDEL	CP000521.1	2809618	2809618	-	A	A1S_2425	hom	hom
INDEL	CP000521.1	2813631	2813631	-	T	A1S_2428	hom	hom
INDEL	CP000521.1	2814759	2814759	C	-	A1S_2429	hom	hom
INDEL	CP000521.1	2815708	2815708	-	A	A1S_2429,A1S_2430,A1S_2431(dist=48)	hom	hom
INDEL	CP000521.1	2822256	2822256	A	-	A1S_2438	hom	hom
INDEL	CP000521.1	2836258	2836258	A	-	A1S_3809	hom	hom
INDEL	CP000521.1	2836267	2836267	-	AT	A1S_3809	hom	hom
INDEL	CP000521.1	2857829	2857829	-	A	A1S_2465,A1S_2466,A1S_2467(dist=75)	hom	hom
INDEL	CP000521.1	2862299	2862299	T	-	A1S_2470	hom	hom
INDEL	CP000521.1	2862328	2862328	-	A	A1S_2470	hom	hom
INDEL	CP000521.1	2874169	2874169	A	-	A1S_2477(dist=40);A1S_2478(dist=362)	hom	hom
INDEL	CP000521.1	2885181	2885181	-	T	A1S_2486	hom	hom
INDEL	CP000521.1	2906690	2906690	-	A	A1S_2506	hom	hom
INDEL	CP000521.1	2906714	2906714	A	-	A1S_2506	hom	hom
INDEL	CP000521.1	2906736	2906736	A	-	A1S_2508(dist=26);A1S_2506,A1S_2507(dist=26)	hom	hom
INDEL	CP000521.1	2915497	2915497	-	A	A1S_2514(dist=90);A1S_2515,A1S_2516(dist=203)	hom	hom
INDEL	CP000521.1	2923178	2923178	-	T	A1S_2523	hom	hom
INDEL	CP000521.1	2930417	2930417	-	A	A1S_2529,A1S_2530,A1S_2531(dist=329)	hom	hom
INDEL	CP000521.1	2931464	2931464	T	-	A1S_2531	hom	hom
INDEL	CP000521.1	2931518	2931518	-	A	A1S_2532,A1S_2533,A1S_2534,A1S_3813(dist=56);A1S_2531(dist=20)	hom	hom
INDEL	CP000521.1	2931649	2931649	-	A	A1S_3813	hom	hom
INDEL	CP000521.1	2938716	2938716	-	A	A1S_2540	hom	hom
INDEL	CP000521.1	2950382	2950382	-	G	A1S_2554,A1S_2555,A1S_3814(dist=105);A1S_2553(dist=269)	hom	hom
INDEL	CP000521.1	2950384	2950384	-	TAGCTC	A1S_2554,A1S_2555,A1S_3814(dist=103);A1S_2553(dist=271)	hom	hom
INDEL	CP000521.1	2950442	2950442	A	-	A1S_2554,A1S_2555,A1S_3814(dist=45);A1S_2553(dist=329)	hom	hom
INDEL	CP000521.1	2950848	2950848	-	A	A1S_2554	hom	hom
INDEL	CP000521.1	2962493	2962493	-	T	A1S_2564	hom	hom
INDEL	CP000521.1	2966320	2966320	-	T	A1S_2566,A1S_2567(dist=362)	hom	hom
INDEL	CP000521.1	2972698	2972698	-	A	A1S_2573,A1S_2574	hom	hom
INDEL	CP000521.1	2978693	2978693	-	A	A1S_2576(dist=94);A1S_2577(dist=27)	hom	hom
INDEL	CP000521.1	2978701	2978701	-	C	A1S_2576(dist=102);A1S_2577(dist=19)	hom	hom
INDEL	CP000521.1	2978726	2978726	-	A	A1S_2577	hom	hom
INDEL	CP000521.1	3002180	3002180	-	GCTGAAGATGCTAAGCGCAAAGCTGAGGCTGATGCGAAAGCTAAACAGCAAAAAGCG	A1S_2593	hom	hom
INDEL	CP000521.1	3023410	3023410	T	-	A1S_2613	hom	hom
INDEL	CP000521.1	3029280	3029280	-	A	A1S_2618	hom	hom
INDEL	CP000521.1	3034743	3034743	-	A	A1S_2624(dist=229);A1S_2623(dist=88)	hom	hom
INDEL	CP000521.1	3041681	3041681	-	CA	A1S_2627(dist=110);A1S_2628(dist=65)	hom	hom
INDEL	CP000521.1	3066681	3066681	-	T	A1S_2649	hom	hom
INDEL	CP000521.1	3066692	3066692	T	-	A1S_2649	hom	hom
INDEL	CP000521.1	3066717	3066717	G	-	A1S_2649	hom	hom
INDEL	CP000521.1	3086712	3086712	G	-	A1S_2661,A1S_2662(dist=18)	hom	hom
INDEL	CP000521.1	3086725	3086725	-	T	A1S_2661,A1S_2662(dist=5)	hom	hom
INDEL	CP000521.1	3094402	3094402	-	A	A1S_2668	hom	hom
INDEL	CP000521.1	3094421	3094421	A	-	A1S_2668	hom	hom
INDEL	CP000521.1	3117504	3117504	-	A	A1S_2691	hom	hom
INDEL	CP000521.1	3154175	3154175	-	T	A1S_2717	hom	hom
INDEL	CP000521.1	3164749	3164750	TC	-	A1S_2726(dist=207);A1S_2727,A1S_2728(dist=21)	hom	hom
INDEL	CP000521.1	3164782	3164782	T	-	A1S_2727	hom	hom
INDEL	CP000521.1	3171015	3171015	-	A	A1S_2733	hom	hom
INDEL	CP000521.1	3171186	3171186	-	A	A1S_2734,A1S_2735(dist=31);A1S_2733(dist=86)	hom	hom
INDEL	CP000521.1	3178241	3178241	-	T	A1S_2739(dist=176);A1S_2737,A1S_2738,A1S_2740,A1S_3834(dist=176)	hom	hom
INDEL	CP000521.1	3180221	3180221	-	T	A1S_2740,A1S_2741,A1S_2742(dist=764)	hom	hom
INDEL	CP000521.1	3183305	3183305	T	-	A1S_2742	hom	hom
INDEL	CP000521.1	3183322	3183322	A	-	A1S_2743(dist=81);A1S_2742,A1S_2744(dist=81)	hom	hom
INDEL	CP000521.1	3183357	3183357	-	A	A1S_2743(dist=46);A1S_2742,A1S_2744(dist=46)	hom	hom
INDEL	CP000521.1	3183362	3183362	-	T	A1S_2743(dist=41);A1S_2742,A1S_2744(dist=41)	hom	hom
INDEL	CP000521.1	3203809	3203810	AC	-	A1S_2762	hom	hom
INDEL	CP000521.1	3279646	3279646	-	T	A1S_2833,A1S_2834(dist=39);A1S_2832,A1S_2835(dist=216)	hom	hom
INDEL	CP000521.1	3291393	3291393	T	-	A1S_2842,A1S_2843,A1S_2844,A1S_2845,A1S_2846(dist=45)	hom	hom
INDEL	CP000521.1	3291442	3291442	T	-	A1S_2844	hom	hom
INDEL	CP000521.1	3295632	3295632	-	T	A1S_2848	hom	hom
INDEL	CP000521.1	3302359	3302359	T	-	A1S_2853	hom	hom
INDEL	CP000521.1	3302415	3302415	A	-	A1S_2854(dist=151);A1S_2852,A1S_2853(dist=53)	hom	hom
INDEL	CP000521.1	3309204	3309205	TC	-	A1S_2860,A1S_2861,A1S_2862(dist=48)	hom	hom
INDEL	CP000521.1	3309207	3309207	-	TC	A1S_2860,A1S_2861,A1S_2862(dist=46)	hom	hom
INDEL	CP000521.1	3309210	3309211	CT	-	A1S_2860,A1S_2861,A1S_2862(dist=42)	hom	hom
INDEL	CP000521.1	3309215	3309217	AAG	-	A1S_2860,A1S_2861,A1S_2862(dist=36)	hom	hom
INDEL	CP000521.1	3309224	3309233	ACGTAAATGC	-	A1S_2860,A1S_2861,A1S_2862(dist=20)	hom	hom
INDEL	CP000521.1	3314113	3314113	-	A	A1S_2864,A1S_2865(dist=84);A1S_2863(dist=514)	hom	hom
INDEL	CP000521.1	3316753	3316753	-	T	A1S_2868	hom	hom
INDEL	CP000521.1	3334492	3334492	A	-	A1S_2884	hom	hom
INDEL	CP000521.1	3378697	3378697	A	-	A1S_2915	hom	hom
INDEL	CP000521.1	3378700	3378700	A	-	A1S_2916(dist=82);A1S_2914,A1S_2915,A1S_2917(dist=82)	hom	hom
INDEL	CP000521.1	3379262	3379262	T	-	A1S_2915,A1S_2916,A1S_2917(dist=35)	hom	hom
INDEL	CP000521.1	3379275	3379275	T	-	A1S_2915,A1S_2916,A1S_2917(dist=22)	hom	hom
INDEL	CP000521.1	3387351	3387351	A	-	A1S_2925,A1S_2926	hom	hom
INDEL	CP000521.1	3417123	3417123	-	T	A1S_3852,A1S_3853(dist=150);A1S_3854(dist=3)	hom	hom
INDEL	CP000521.1	3430415	3430415	-	CCA	A1S_2946,A1S_2947,A1S_2948,A1S_2949,A1S_2950,A1S_3861(dist=27)	hom	hom
INDEL	CP000521.1	3430422	3430423	CT	-	A1S_2946,A1S_2947,A1S_2948,A1S_2949,A1S_2950,A1S_3861(dist=19)	hom	hom
INDEL	CP000521.1	3430425	3430426	GT	-	A1S_2946,A1S_2947,A1S_2948,A1S_2949,A1S_2950,A1S_3861(dist=16)	hom	hom
INDEL	CP000521.1	3431037	3431037	A	-	A1S_2948,A1S_2949	hom	hom
INDEL	CP000521.1	3431044	3431044	A	-	A1S_2948,A1S_2949	hom	hom
INDEL	CP000521.1	3435875	3435875	-	A	A1S_2952(dist=135)	hom	hom
INDEL	CP000521.1	3441296	3441296	T	-	A1S_2955(dist=375)	-	hom
INDEL	CP000521.1	3441456	3441458	CTG	-	A1S_2955,A1S_2956(dist=213)	hom	hom
INDEL	CP000521.1	3441564	3441564	-	A	A1S_2955,A1S_2956(dist=107)	hom	hom
INDEL	CP000521.1	3444420	3444420	-	A	A1S_2956,A1S_3865(dist=37);A1S_2957,A1S_3864(dist=354)	hom	hom
INDEL	CP000521.1	3450859	3450859	-	T	A1S_3867,A1S_3868(dist=142);A1S_3866(dist=158)	hom	hom
INDEL	CP000521.1	3451365	3451365	-	A	A1S_3867	hom	hom
INDEL	CP000521.1	3454245	3454245	-	T	A1S_2962(dist=624);A1S_2963(dist=64)	hom	hom
INDEL	CP000521.1	3458778	3458778	-	T	A1S_2967	hom	hom
INDEL	CP000521.1	3460446	3460446	T	-	A1S_2969(dist=38);A1S_2968(dist=281)	hom	hom
INDEL	CP000521.1	3465510	3465510	-	A	A1S_2972	hom	hom
INDEL	CP000521.1	3468391	3468396	GTGATG	-	A1S_2977,A1S_3873	hom	hom
INDEL	CP000521.1	3471234	3471234	-	A	A1S_2981	hom	hom
INDEL	CP000521.1	3477223	3477223	-	T	A1S_2988	hom	hom
INDEL	CP000521.1	3477643	3477643	-	A	A1S_3874	hom	hom
INDEL	CP000521.1	3500513	3500513	A	-	A1S_3013,A1S_3014(dist=323)	het	het
INDEL	CP000521.1	3506094	3506094	-	T	A1S_3016(dist=25)	hom	hom
INDEL	CP000521.1	3506102	3506102	-	CA	A1S_3016(dist=17)	hom	hom
INDEL	CP000521.1	3515366	3515366	-	A	A1S_3028	hom	hom
INDEL	CP000521.1	3528080	3528080	-	A	A1S_3043(dist=215);A1S_3042(dist=573)	hom	hom
INDEL	CP000521.1	3534889	3534889	-	T	A1S_3046	hom	hom
INDEL	CP000521.1	3551583	3551583	T	-	A1S_3064	hom	hom
INDEL	CP000521.1	3564937	3564937	-	C	A1S_3086	hom	hom
INDEL	CP000521.1	3566939	3566939	-	A	A1S_3088,A1S_3089(dist=24)	hom	hom
INDEL	CP000521.1	3569404	3569404	-	T	A1S_3090,A1S_3091(dist=78)	hom	hom
INDEL	CP000521.1	3573425	3573425	A	-	A1S_3094	hom	hom
INDEL	CP000521.1	3578696	3578696	-	C	A1S_3098	hom	hom
INDEL	CP000521.1	3579286	3579286	-	C	A1S_3100	hom	hom
INDEL	CP000521.1	3585646	3585646	-	AC	A1S_3105(dist=3);A1S_3106(dist=118)	hom	hom
INDEL	CP000521.1	3610075	3610075	-	T	A1S_3124,A1S_3125,A1S_3126(dist=35)	hom	hom
INDEL	CP000521.1	3610089	3610089	-	A	A1S_3124,A1S_3125,A1S_3126(dist=21)	hom	hom
INDEL	CP000521.1	3619058	3619058	G	-	A1S_3131,A1S_3132(dist=128);A1S_3133,A1S_3134(dist=20)	hom	hom
INDEL	CP000521.1	3619067	3619067	G	-	A1S_3131,A1S_3132(dist=137);A1S_3133,A1S_3134(dist=11)	hom	hom
INDEL	CP000521.1	3619095	3619095	T	-	A1S_3133	hom	hom
INDEL	CP000521.1	3621363	3621363	-	A	A1S_3134(dist=636);A1S_3135(dist=399)	hom	hom
INDEL	CP000521.1	3623239	3623239	-	A	A1S_3135(dist=44);A1S_3136(dist=368)	hom	hom
INDEL	CP000521.1	3623426	3623426	-	T	A1S_3135(dist=231);A1S_3136(dist=181)	hom	hom
INDEL	CP000521.1	3631574	3631574	A	-	A1S_3144	hom	hom
INDEL	CP000521.1	3631581	3631581	T	-	A1S_3144	hom	hom
INDEL	CP000521.1	3631587	3631587	T	-	A1S_3145(dist=401);A1S_3144(dist=2)	hom	hom
INDEL	CP000521.1	3642286	3642286	T	-	A1S_3157	hom	hom
INDEL	CP000521.1	3662076	3662076	T	-	A1S_3176	hom	hom
INDEL	CP000521.1	3683961	3683961	G	-	A1S_3196	hom	hom
INDEL	CP000521.1	3686886	3686886	-	T	A1S_3201	hom	hom
INDEL	CP000521.1	3688793	3688793	-	T	A1S_3202(dist=2);A1S_3203(dist=6)	hom	hom
INDEL	CP000521.1	3695605	3695605	A	-	A1S_3209	hom	hom
INDEL	CP000521.1	3695672	3695672	T	-	A1S_3210(dist=113);A1S_3208,A1S_3209(dist=25)	hom	hom
INDEL	CP000521.1	3700055	3700061	CTAAAAA	-	A1S_3212,A1S_3884(dist=90)	hom	hom
INDEL	CP000521.1	3721551	3721551	T	-	A1S_3228	hom	hom
INDEL	CP000521.1	3727512	3727512	-	C	A1S_3234(dist=302);A1S_3231,A1S_3232,A1S_3233(dist=302)	hom	hom
INDEL	CP000521.1	3739293	3739293	-	T	A1S_3247,A1S_3248,A1S_3250,A1S_3251(dist=120)	hom	hom
INDEL	CP000521.1	3750131	3750131	-	A	A1S_3891(dist=254);A1S_3260,A1S_3261(dist=134)	hom	hom
INDEL	CP000521.1	3758233	3758233	-	T	A1S_3894	hom	hom
INDEL	CP000521.1	3758338	3758338	T	-	A1S_3269,A1S_3894	hom	hom
INDEL	CP000521.1	3812401	3812401	-	T	A1S_3316	hom	hom
INDEL	CP000521.1	3823261	3823261	-	T	A1S_3324	hom	hom
INDEL	CP000521.1	3823319	3823319	-	T	A1S_3325(dist=122);A1S_3324,A1S_3326(dist=122)	hom	hom
INDEL	CP000521.1	3846455	3846455	-	T	A1S_3343	hom	hom
INDEL	CP000521.1	3850367	3850367	A	-	A1S_3347	hom	hom
INDEL	CP000521.1	3850372	3850372	A	-	A1S_3347	hom	hom
INDEL	CP000521.1	3860370	3860370	A	-	A1S_3359	hom	hom
INDEL	CP000521.1	3860388	3860388	A	-	A1S_3359	hom	hom
INDEL	CP000521.1	3860393	3860393	T	-	A1S_3359	hom	hom
INDEL	CP000521.1	3864405	3864405	-	T	A1S_3362(dist=541);A1S_3361(dist=22)	hom	hom
INDEL	CP000521.1	3869954	3869954	-	GATGCTCCAGATGCTCCAGATGCTCCAGATGCTCCAGATGCTCCAGATGCTCCAGATGCTCCAGATGCTCC	A1S_3363	hom	hom
INDEL	CP000521.1	3870893	3870893	-	AA	A1S_3364	hom	hom
INDEL	CP000521.1	3874842	3874842	T	-	A1S_3365,A1S_3904(dist=112);A1S_3366(dist=5)	hom	hom
INDEL	CP000521.1	3874876	3874876	T	-	A1S_3366	hom	hom
INDEL	CP000521.1	3883587	3883587	-	G	A1S_3374	hom	hom
INDEL	CP000521.1	3886969	3886969	C	-	A1S_3377(dist=201);A1S_3378,A1S_3379(dist=21)	hom	hom
INDEL	CP000521.1	3890925	3890925	-	T	A1S_3382	hom	hom
INDEL	CP000521.1	3892977	3892977	-	A	A1S_3382(dist=648);A1S_3383,A1S_3384,A1S_3385(dist=35)	hom	hom
INDEL	CP000521.1	3894443	3894443	A	-	A1S_3384,A1S_3385(dist=362);A1S_3386(dist=49)	hom	hom
INDEL	CP000521.1	3901577	3901577	A	-	A1S_3393	hom	hom
INDEL	CP000521.1	3901585	3901585	A	-	A1S_3393	hom	hom
INDEL	CP000521.1	3901594	3901594	A	-	A1S_3394,A1S_3395(dist=233);A1S_3392,A1S_3393(dist=9)	hom	hom
INDEL	CP000521.1	3901649	3901649	A	-	A1S_3394,A1S_3395(dist=178);A1S_3392,A1S_3393(dist=64)	hom	hom
INDEL	CP000521.1	3903148	3903148	C	-	A1S_3395	hom	hom
INDEL	CP000521.1	3910391	3910391	-	T	A1S_3401	hom	hom
INDEL	CP000521.1	3916901	3916901	A	-	A1S_3407	hom	hom
INDEL	CP000521.1	3921206	3921206	-	A	A1S_3410	hom	hom
INDEL	CP000521.1	3928909	3928909	-	T	A1S_3417,A1S_3418(dist=33)	hom	hom
INDEL	CP000521.1	3939776	3939776	-	T	A1S_3428	hom	hom
INDEL	CP000521.1	3940122	3940122	-	TCCTAATGGGTTACGATG	A1S_3428	hom	hom
INDEL	CP000521.1	3944373	3944373	-	T	A1S_3432	hom	hom
INDEL	CP000521.1	3944498	3944498	-	A	A1S_3433,A1S_3434,A1S_3435(dist=47);A1S_3432(dist=85)	hom	hom
INDEL	CP000521.1	3944507	3944507	-	C	A1S_3433,A1S_3434,A1S_3435(dist=38);A1S_3432(dist=94)	hom	hom
INDEL	CP000521.1	3957377	3957377	-	T	A1S_3446	hom	hom
INDEL	CP000521.1	3957489	3957489	-	TA	A1S_3446	hom	hom
INDEL	CP000521.1	3957498	3957498	-	A	A1S_3446	hom	hom
INDEL	CP000521.1	3964609	3964609	-	A	A1S_3450	hom	hom
INDEL	CP000522.1	8118	8118	-	T	A1S_3466(dist=433);A1S_3467(dist=484)	hom	hom
INDEL	P3	28	28	A	-	NONE(dist=NONE),NONE(dist=NONE)	hom	hom
INDEL	P3	36	36	C	-	NONE(dist=NONE),NONE(dist=NONE)	hom	hom
INDEL	P3	8080	8080	A	-	NONE(dist=NONE),NONE(dist=NONE)	hom	hom
