# Supplementary figures and images for: A unique cell division protein critical for the assembly of the bacterial divisome
Source: eLife journal article supplement (doi:10.7554/elife.87922), 2023-06-23

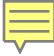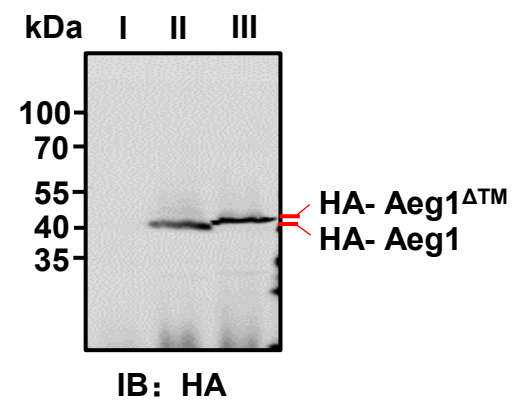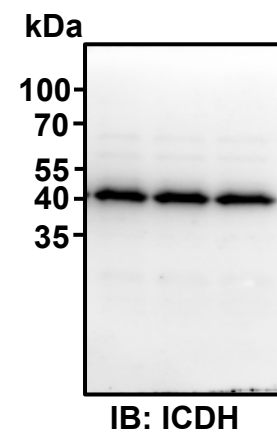

Supplement: fig1-data1 [file elife-87922-fig1-data1-v1.zip]

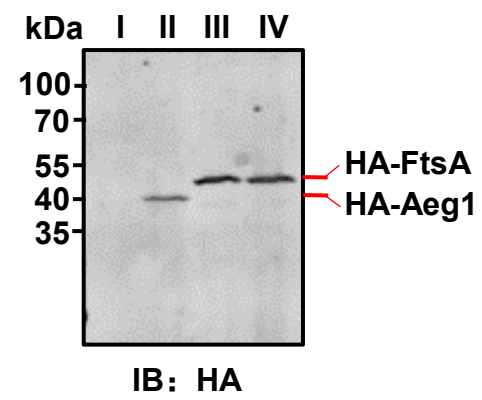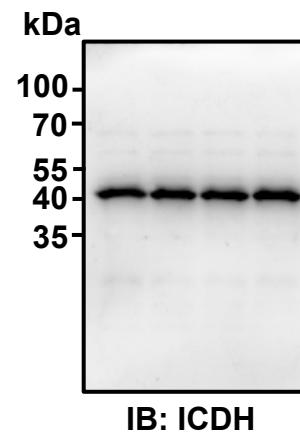

Supplement: fig3-data1 [file elife-87922-fig3-data1-v1.zip]

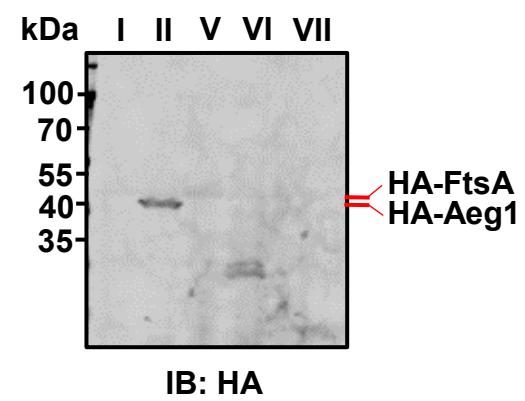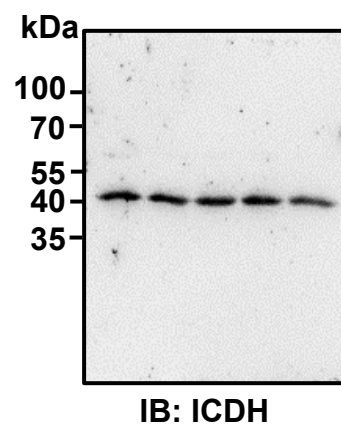

Supplement: fig3-data1 [file elife-87922-fig3-data1-v1.zip]

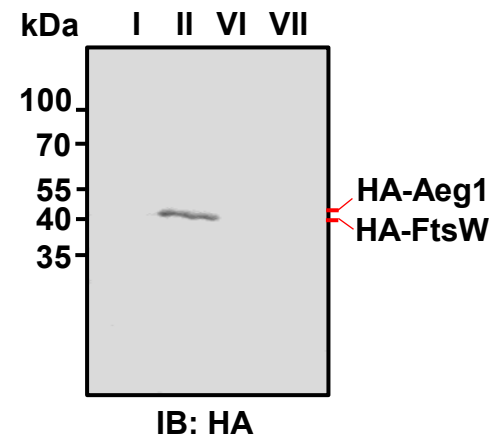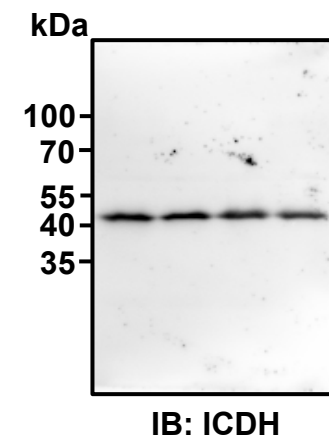

Supplement: fig5-data1 [file elife-87922-fig5-data1-v1.zip]

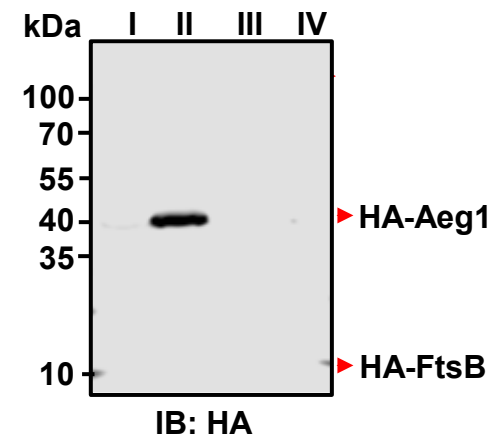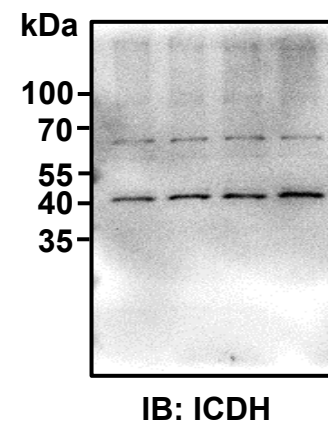

Supplement: fig5-data1 [file elife-87922-fig5-data1-v1.zip]

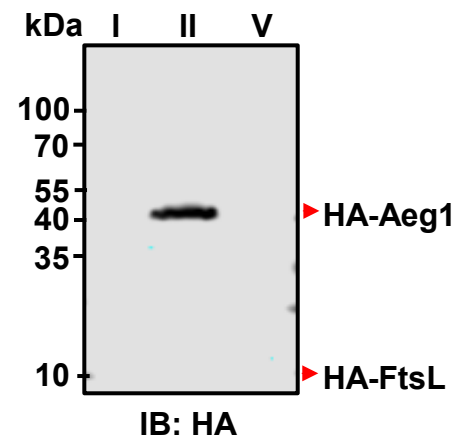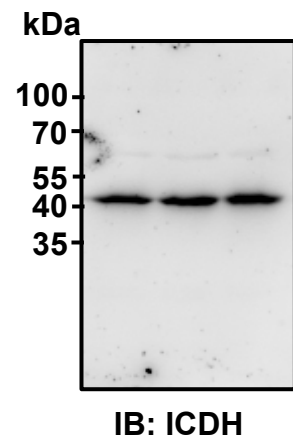

Supplement: fig5-data1 [file elife-87922-fig5-data1-v1.zip]
